# Supplementary material
Source: PubMed Central journal article supplement (PMC6219755)

# Supporting Information

## A cyclopropenethione-phosphine ligation for rapid biomolecule labeling

R. David Row<sup>†</sup> and Jennifer A. Prescher<sup>†,‡,§</sup>

<sup>†</sup>Departments of Chemistry, <sup>‡</sup>Molecular Biology & Biochemistry, and <sup>§</sup>Pharmaceutical Sciences, University of California, Irvine, California 92697, United States

\*Correspondence should be addressed to [jpresche@uci.edu](mailto:jpresche@uci.edu)

## Contents

|                                                           |     |
|-----------------------------------------------------------|-----|
| <b>I. General information</b>                             | S3  |
| <b>II. Stability experiments</b>                          | S4  |
| <b>III. Kinetics experiments</b>                          | S10 |
| <b>IV. CpS reactivity with model phosphines</b>           | S11 |
| <b>V. Protein functionalization and mass spectrometry</b> | S13 |
| <b>VI. Western blot analysis of protein conjugates</b>    | S16 |
| <b>VII. Synthetic procedures</b>                          | S18 |
| <b>VIII. NMR spectra</b>                                  | S21 |

## List of Figures and Schemes

|                                                                                            |     |
|--------------------------------------------------------------------------------------------|-----|
| <b>Figure S1.</b> Cyclopropenethione <b>3b</b> is stable in <i>d</i> -PBS.                 | S5  |
| <b>Figure S2.</b> Cyclopropenethione <b>3c</b> is stable for ~24 h in <i>d</i> -PBS.       | S6  |
| <b>Figure S3.</b> Cyclopropenethione <b>3d</b> is stable in <i>d</i> -PBS.                 | S7  |
| <b>Figure S4.</b> Cyclopropenethione <b>3b</b> is stable to L-glutathione.                 | S8  |
| <b>Figure S5.</b> Cyclopropenethione <b>3d</b> is stable to L-glutathione.                 | S9  |
| <b>Figure S6.</b> Rate comparison of compounds <b>2d</b> and <b>3d</b> .                   | S10 |
| <b>Figure S7.</b> Phosphine double addition into cyclopropenethiones.                      | S11 |
| <b>Figure S8.</b> Hydrogen bond activation.                                                | S11 |
| <b>Figure S9.</b> LC-MS plots of CpS-phosphine ligations.                                  | S12 |
| <b>Figure S10.</b> Mass spectrometry analysis of functionalized lysozyme.                  | S14 |
| <b>Figure S11.</b> Mass spectrometry analysis of ligated proteins.                         | S15 |
| <b>Figure S12.</b> <b>Lys-CpS</b> is stable for up to 7 days.                              | S15 |
| <b>Figure S13.</b> Western blot of <b>Lys-CpO</b> and <b>Lys-CpS</b> reaction time course. | S17 |
| <b>Scheme 1.</b> Thionoester product confirmation.                                         | S11 |

## I. General information

All reagents and solvents were used as received, unless specified otherwise. Anhydrous organic solvents were prepared by degassing with argon and passing through two 4 x 36 in. columns of anhydrous neutral A2 (8 x 12 mesh; LaRoche Chemicals; activated at 350 °C for 12 h under a flow of argon). Column chromatography was carried out using Silicycle 60 Å (32–64 mesh) silica gel. Thin layer chromatography (TLC) was carried out with Merck Millipore 250 mm silica gel F-254 plates. Plates were visualized using UV light or KMnO<sub>4</sub> stain. Organic solutions were concentrated under reduced pressure using a Büchi rotary evaporator. HPLC purifications were performed on a Varian ProStar equipped with 325 Dual Wavelength UV-Vis Detector, using an Agilent Prep-C18 Scalar column (9.4 x 150 mm, 5 µm) with a 4 mL/min flow rate.

<sup>1</sup>H, <sup>13</sup>C, <sup>19</sup>F, and <sup>31</sup>P NMR spectra were obtained using either a Bruker DRX400 or a Bruker DRX500 instrument equipped with a cryo probe. <sup>1</sup>H NMR spectra were acquired at 400 MHz or 500 MHz, <sup>13</sup>C NMR spectra were acquired at 126 MHz, <sup>19</sup>F NMR spectra were obtained at 376 MHz, and <sup>31</sup>P NMR spectra were acquired at 162 MHz. Spectra were internally referenced to residual solvent signals (CDCl<sub>3</sub> was referenced to 7.27 ppm for <sup>1</sup>H and 77.16 ppm for <sup>13</sup>C, CD<sub>3</sub>CN was referenced to 1.94 ppm for <sup>1</sup>H and 118.26 ppm for <sup>13</sup>C, D<sub>2</sub>O was referenced to 4.79 ppm for <sup>1</sup>H, C<sub>6</sub>D<sub>6</sub> was referenced to 7.16 ppm for <sup>1</sup>H and 128.06 for <sup>13</sup>C). <sup>19</sup>F and <sup>31</sup>P NMR spectra were referenced by indirect absolute chemical shift to residual protio solvent signals. All spectra were acquired at 298 K. Chemical shifts are reported in ppm, and coupling constants (*J*) are reported in Hz. Mass spectra were acquired at the University of California, Irvine Mass Spectrometry Facility. Protein mass spectra were acquired using a Waters Xevo G2-XS QToF mass spectrometer.

## II. Stability experiments

Cyclopropenethione aqueous stabilities were assessed by dissolving compounds **3b–d** (final concentration 10 mM) in *d*-PBS (50 mM, pH 7.4). The solutions were incubated in an NMR tube at 37 °C. NMR spectra were acquired periodically over 0–7 d. For compound **3c**, a precipitate formed during the course of the experiment.

Cyclopropenethione stabilities to thiols were assessed by dissolving compounds **2b** or **2d** with L-glutathione (final concentration of 5 mM for each reagent) in *d*-PBS (50 mM, pH 7.4). The solutions were then incubated in an NMR tube at 37 °C. NMR spectra were acquired periodically over 0–24 h.

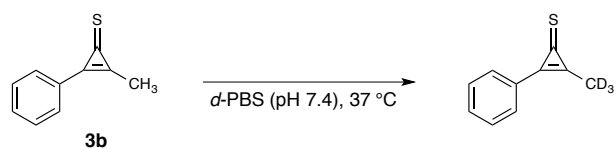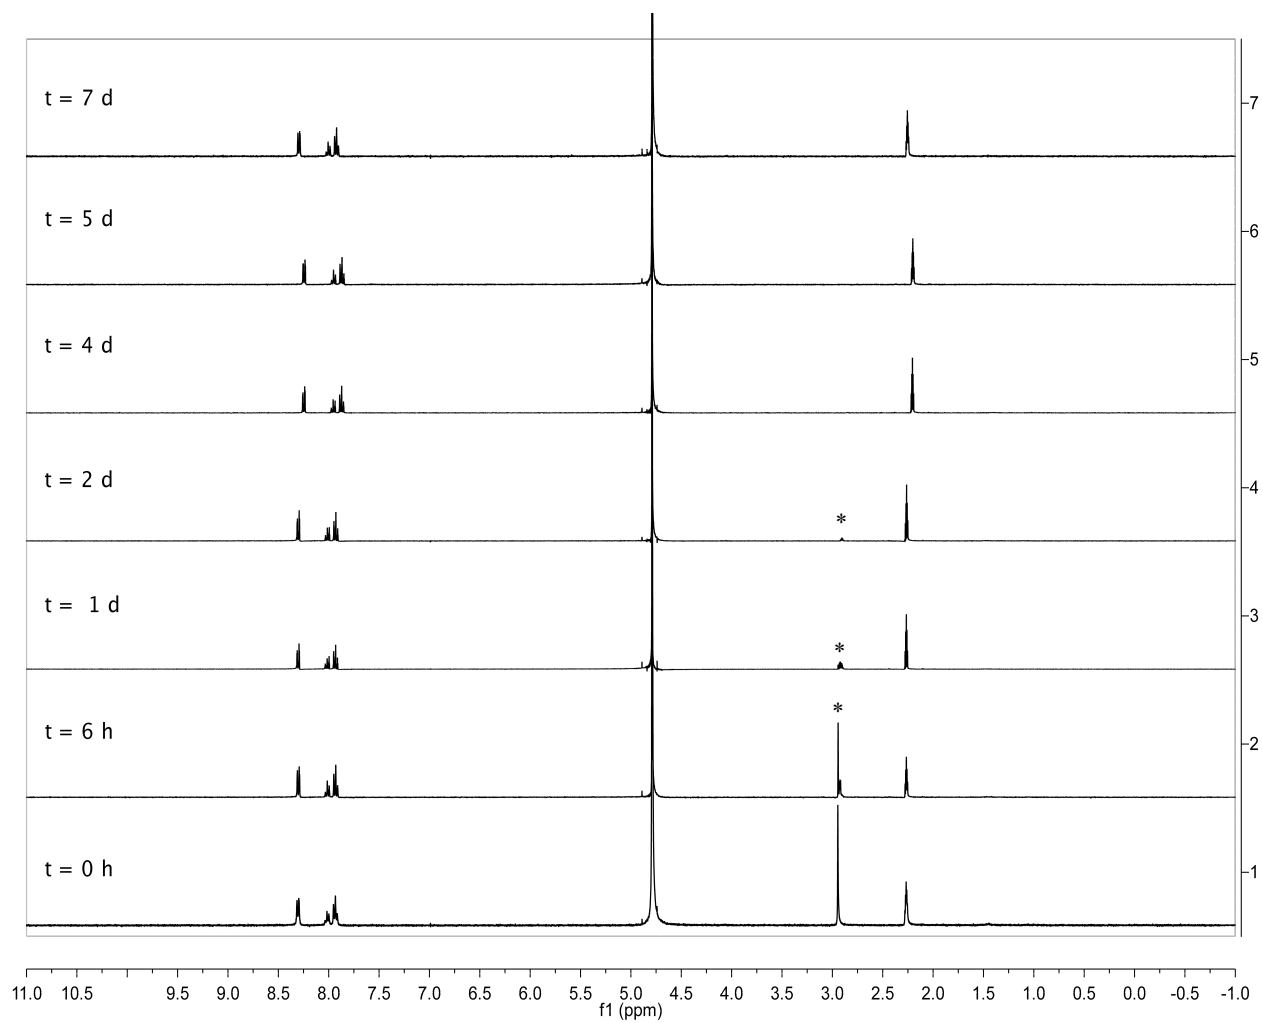

**Figure S1.** Cyclopropenethione **3b** is stable in *d*-PBS. Compound **3b** (10 mM) was incubated in *d*-PBS (50 mM, pH 7.4) at 37 °C and monitored via <sup>1</sup>H NMR spectroscopy.

\*Allylic protons exchanged with deuterium.

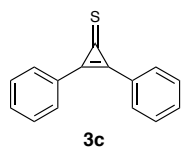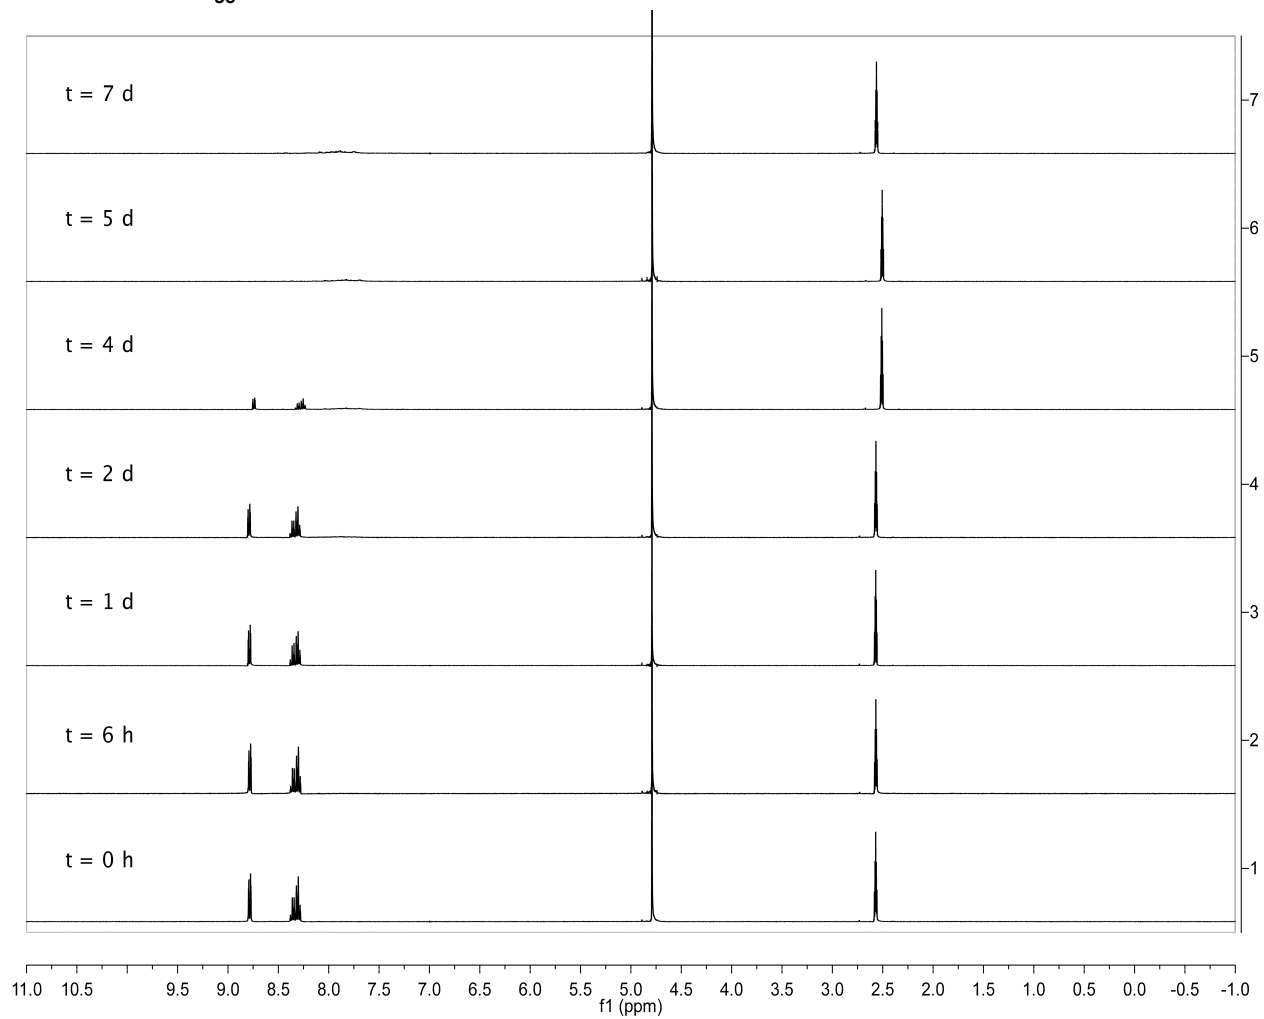

**Figure S2.** Cyclopropenethione **3c** is stable for ~24 h in *d*-PBS. Compound **3c** (10 mM) was incubated in *d*-PBS (50 mM, pH 7.4) at 37 °C and monitored via <sup>1</sup>H NMR spectroscopy.

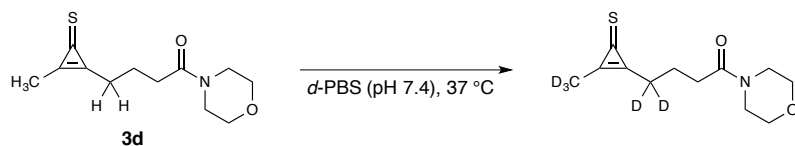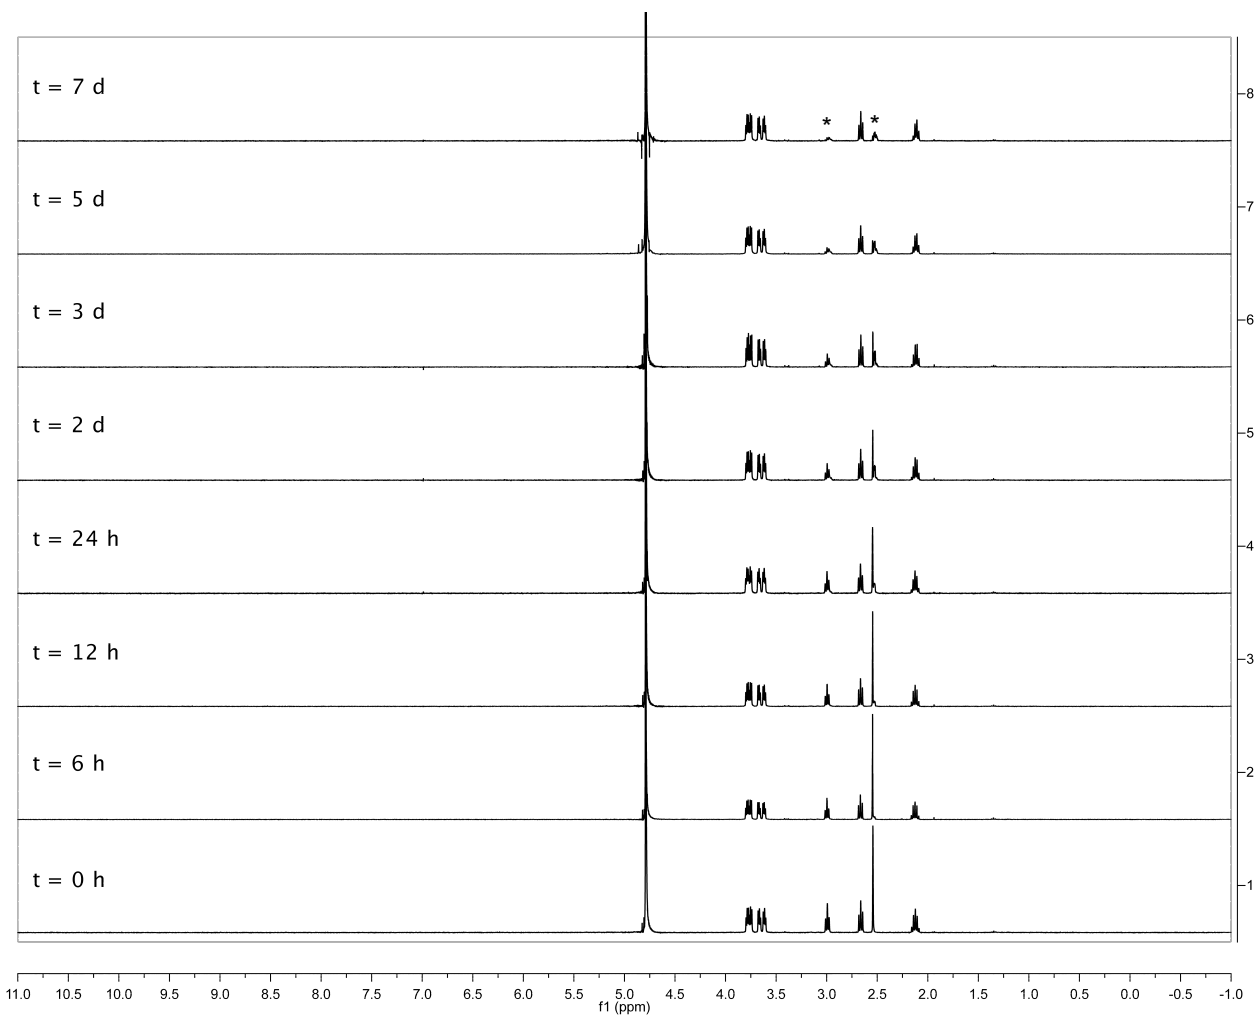

**Figure S3.** Cyclopropenethione **3d** is stable in  $d\text{-PBS}$ . Compound **3d** (10 mM) was incubated in  $d\text{-PBS}$  (pH 7.4) at  $37^\circ\text{C}$  and monitored via  $^1\text{H}$  NMR spectroscopy over 7d.

\*Allylic protons exchanged with deuterium.

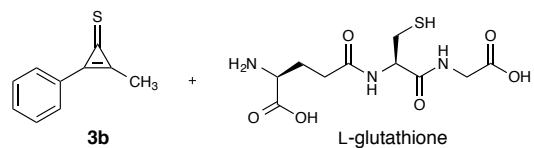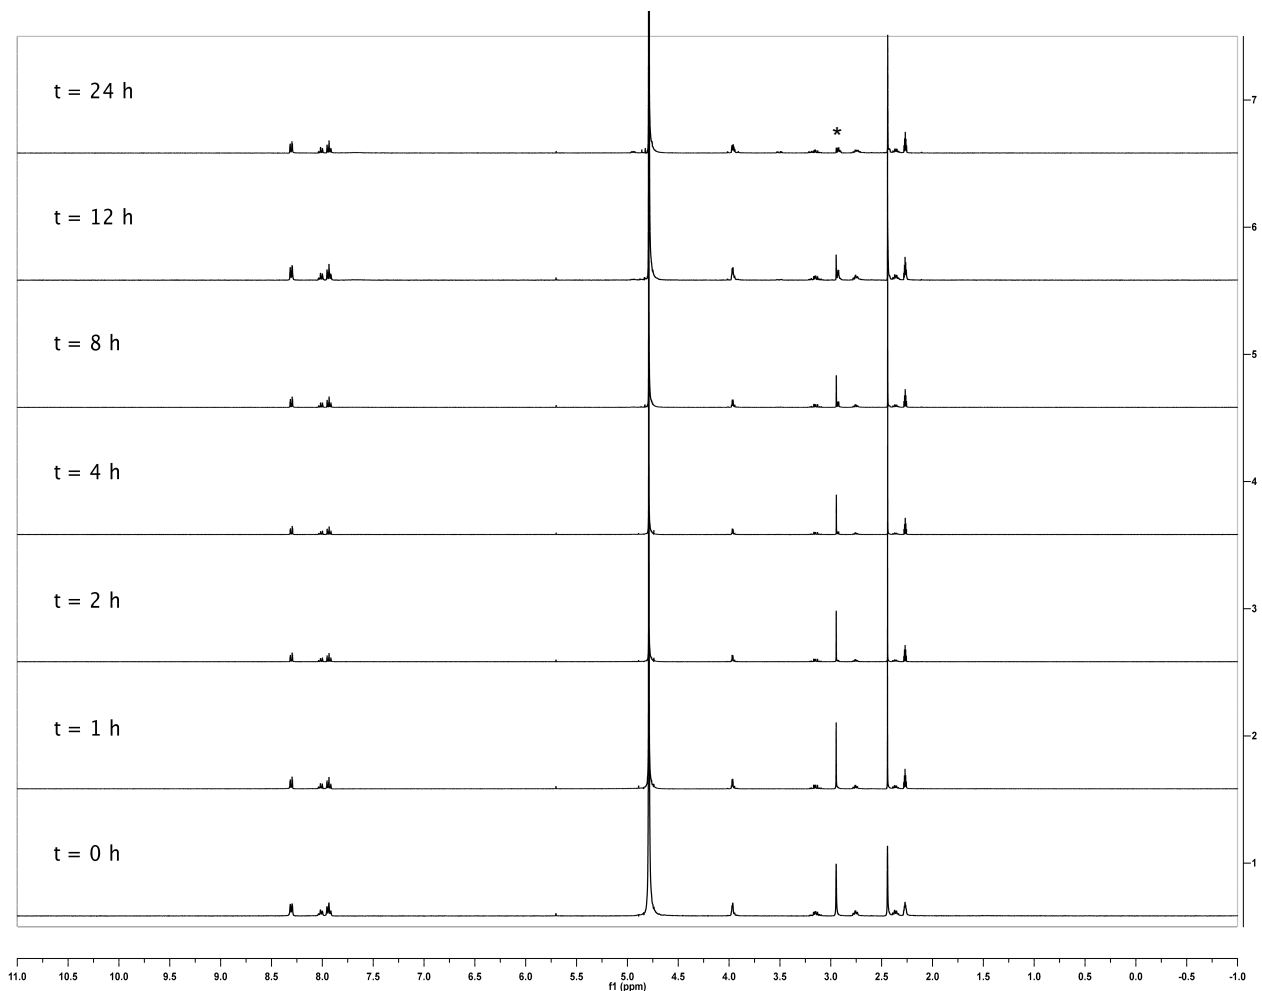

**Figure S4.** Cyclopropenethione **3b** is stable to L-glutathione. Compound **3b** (5 mM) and L-glutathione (5 mM) were incubated in *d*-PBS (50 mM, pH = 7.4) at 37 °C and monitored via <sup>1</sup>H NMR spectroscopy. \*Allylic protons exchanged with deuterium.



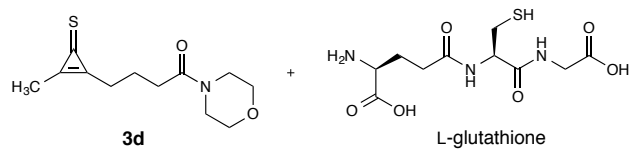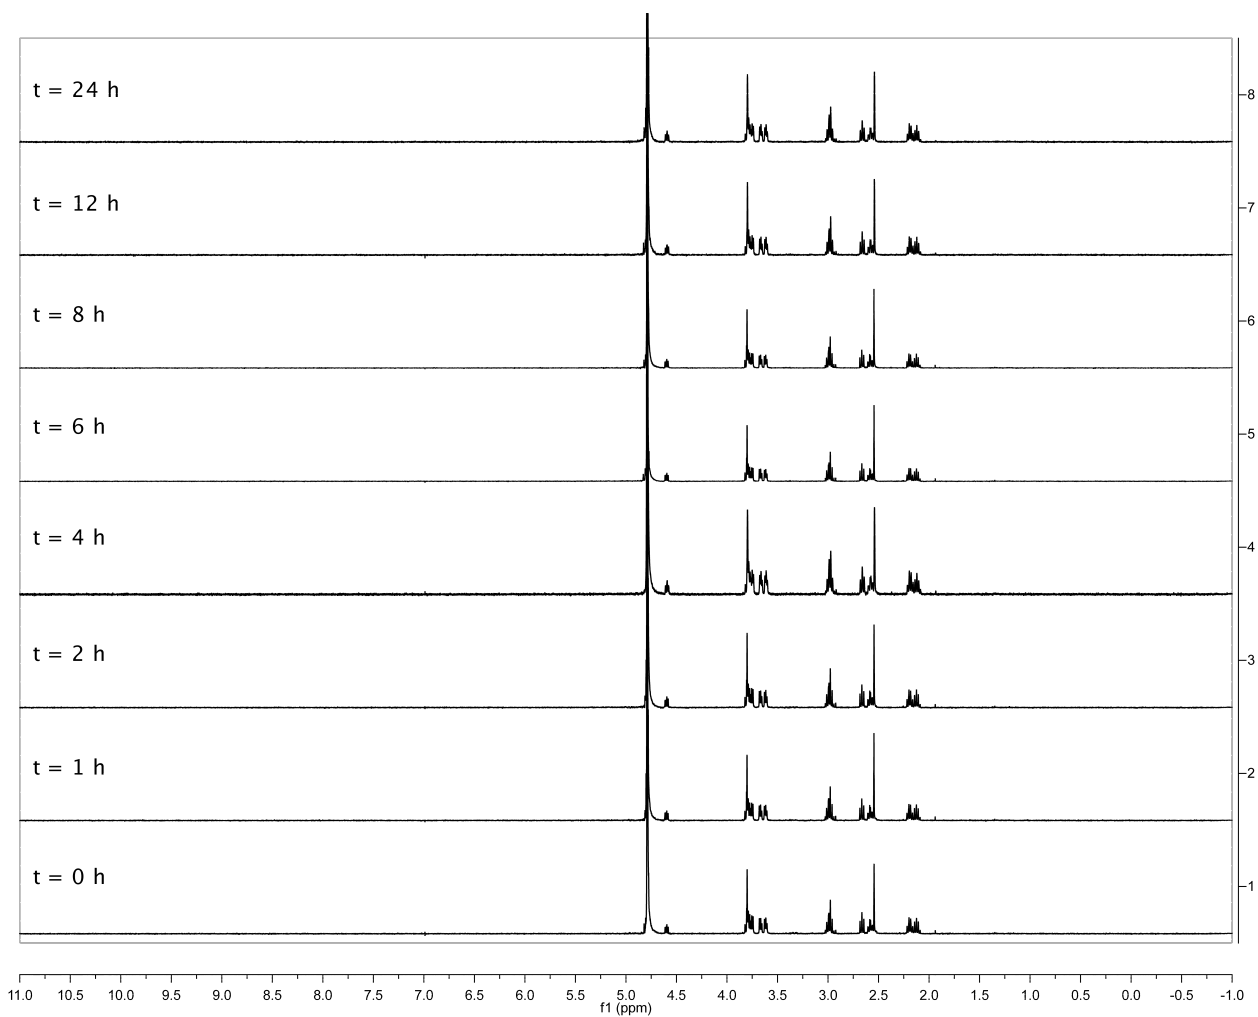

**Figure S5.** Cyclopropanethione **3d** is stable to L-glutathione. Compound **3d** (5 mM) and L-glutathione (5 mM) were incubated in *d*-PBS (50 mM, pH = 7.4) at 37 °C and monitored via <sup>1</sup>H NMR spectroscopy.

### III. Kinetics experiments

All kinetics experiments were performed at room temperature. Reaction progress was monitored via  $^1\text{H}$  NMR spectroscopy, using trimethylsilylacetylene as an internal standard. Phosphines and cyclopropenethiones or cyclopropenones were combined in equimolar ratios (final concentrations of 5 mM or 25 mM). Second order rate constants were calculated using the method of initial rates. Error values are the standard deviation of the mean for  $n = 3$  independent experiments.

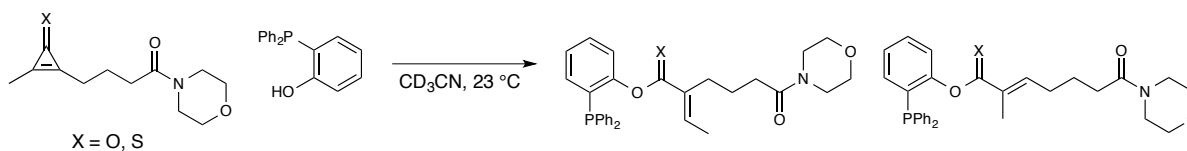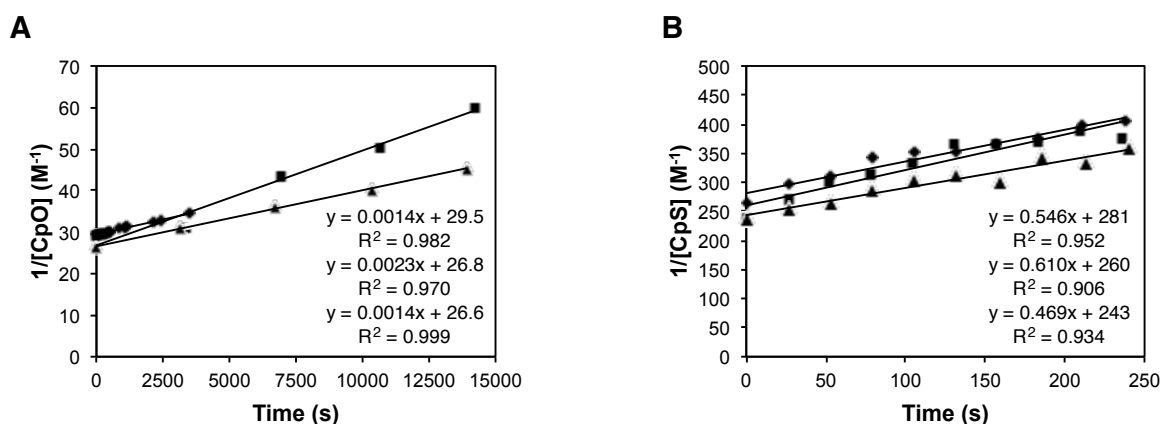

**Figure S6.** Rate comparison of compounds **2d** and **3d**. Second order rate constants were measured for reactions of phosphine **4** (5 or 25 mM) with A) cyclopropenone **2d** (25 mM) and B) cyclopropenethione **3d** (5 mM).

## IV. CpS reactivity with model phosphines

### NMR spectroscopy reaction analysis

Compound **3d** (25 mM final concentration) was treated with phosphines **4–8** (25 mM final concentration) in 650  $\mu\text{L}$  of benzene- $d_6$ . Reactions were incubated at room temperature and product formation was monitored over time via  $^1\text{H}$  and  $^{31}\text{P}$  NMR spectroscopy.

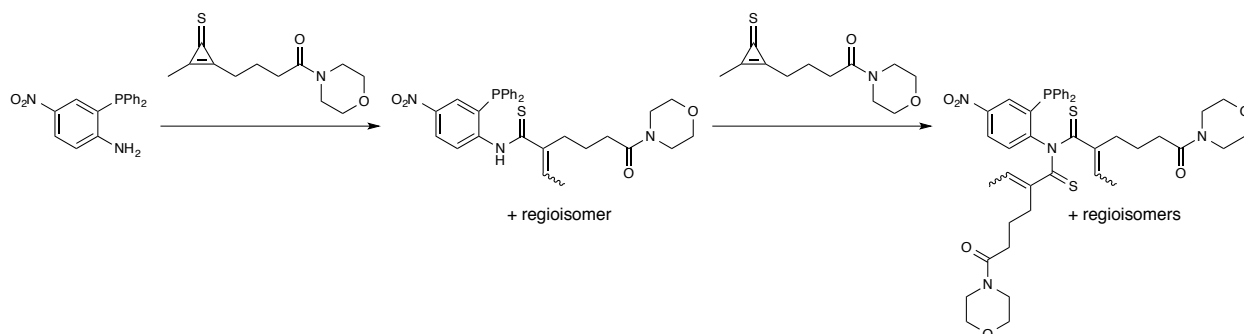

**Figure S7.** Phosphine double addition into cyclopropenethiones. Phosphine **7** can react with more than one equivalent of **3d** to form multiple products.

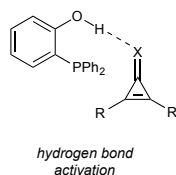

**Figure S8.** Hydrogen bond activation. Previously, we showed that cyclopropenones may be activated for attack via intermolecular hydrogen bonding in organic solvents.<sup>4</sup> Cyclopropenethiones may undergo similar activation.

### Scheme 1. Thionoester product confirmation.

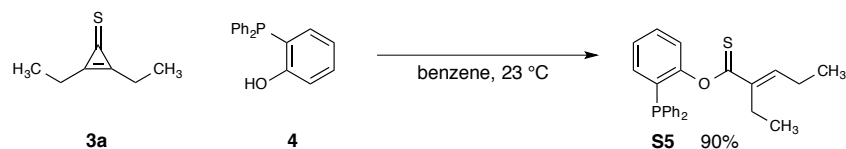

## LC-MS reaction analysis

Reactions between **3d** and (1R,2R)-(-)-2-(diphenylphosphino)cyclohexylamine were analyzed via LC-MS. Compound **3d** (250  $\mu\text{M}$  final concentration) and phosphine (500  $\mu\text{M}$  final concentration) were mixed in PBS containing 50% MeCN and incubated at room temperature for 2 h. Reactions were analyzed on a Waters ACQUITY UPLC with an ACQUITY QDa Mass Detector, using a C18 column and eluting with a gradient of 10-90% MeCN/H<sub>2</sub>O (containing 0.1% formic acid) over 3.5 min.

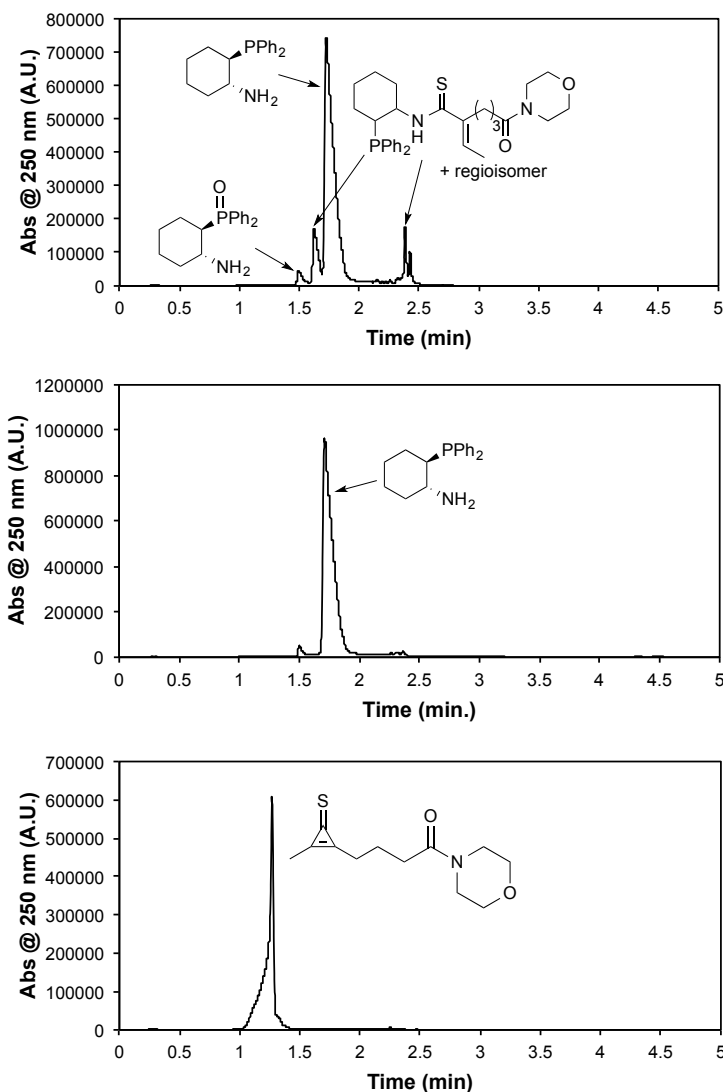

**Figure S9.** LC-MS plots of CpS-phosphine ligations. Compound **3d** (250  $\mu\text{M}$  final concentration) and (1R,2R)-(-)-2-(Diphenylphosphino)cyclohexylamine (500  $\mu\text{M}$  final concentration) were combined in PBS containing 50% MeCN and incubated at room temperature for 2h.

## V. Protein functionalization and mass spectrometry

**Lys-CpS** and **Lys-CpO** were prepared by treating lysozyme with cyclopropenone **S3** or cyclopropenethione **S4** using previously reported conditions.<sup>1</sup> Hen egg-white lysozyme (Sigma Aldrich, 1 mL of a 10 mg/mL solution in 1:1 DMSO/PBS) was treated with 100  $\mu\text{L}$  of either **S3** or **S4** (100 mM stock in DMSO). The solution was allowed to stand at room temperature for 3–5 h. The functionalized proteins were isolated using P-10 Biogel (BioRad), eluting with PBS (12 mM, pH 7.4). Protein-containing fractions were combined and concentrated to a volume of  $\sim 100$   $\mu\text{L}$  using a spin filter (3 kDa molecular weight cutoff). PBS (12 mM, pH 7.4) was then added to bring the volume to 400  $\mu\text{L}$ , and the sample was concentrated again. This process was repeated 3 times to remove excess small molecules. Protein concentrations were measured with a Nanodrop<sup>®</sup> ND-1000 (Thermo Scientific), using absorbance readings at 280 nm and an extinction coefficient of  $36 \text{ mM}^{-1} \text{ cm}^{-1}$ .<sup>2</sup>

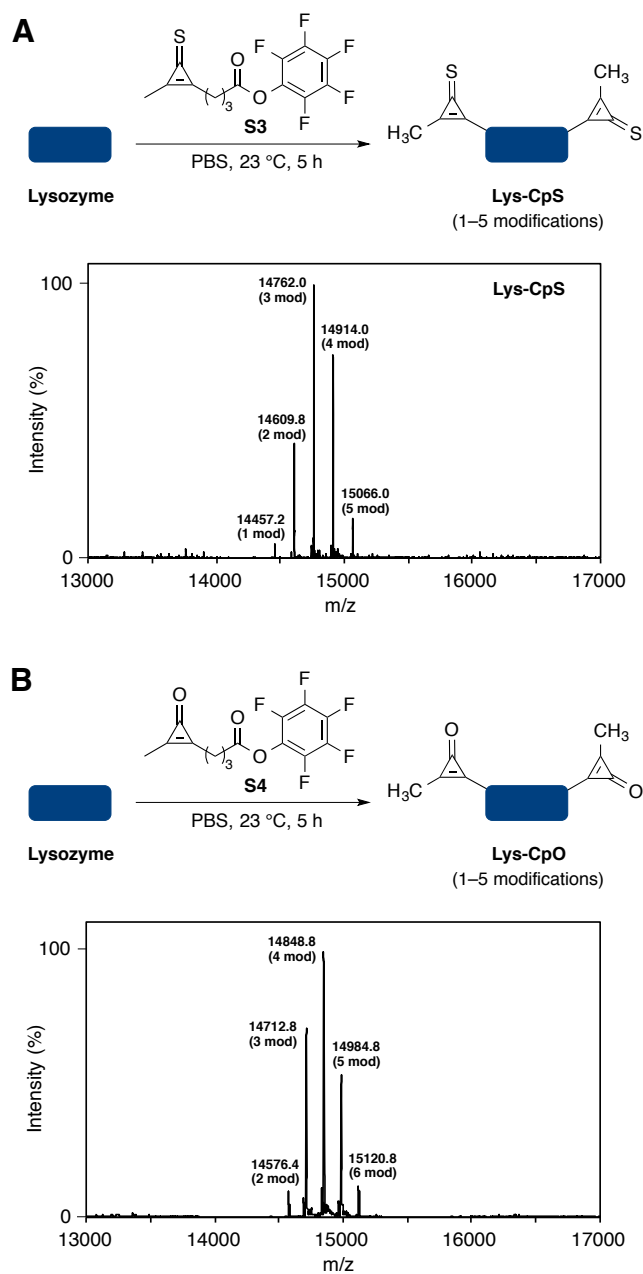

**Figure S10.** Mass spectrometry analysis of functionalized lysozyme. Lysozyme functionalization with A) cyclopropenethione **S4** and B) cyclopropenone **S3** was confirmed via mass spectrometry (ESI). The functionalized proteins comprised 1–6 modifications.

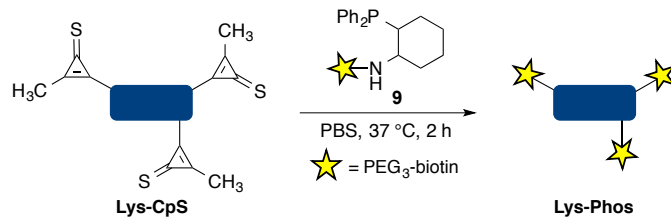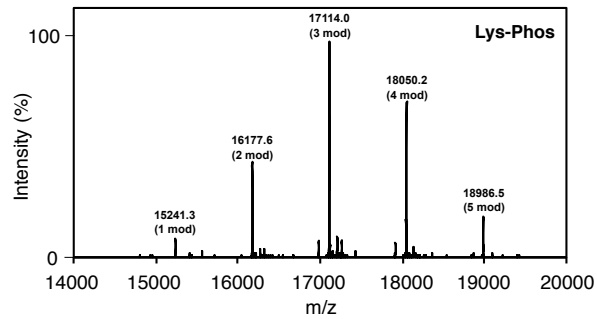

**Figure S11.** Mass spectrometry analysis of ligated proteins. **Lys-CpS** (20  $\mu\text{M}$ ) was treated with **9** (500  $\mu\text{M}$ ) in PBS (pH 7.4) at 37  $^\circ\text{C}$  for 2 h. The reaction products were confirmed via mass spectrometry.

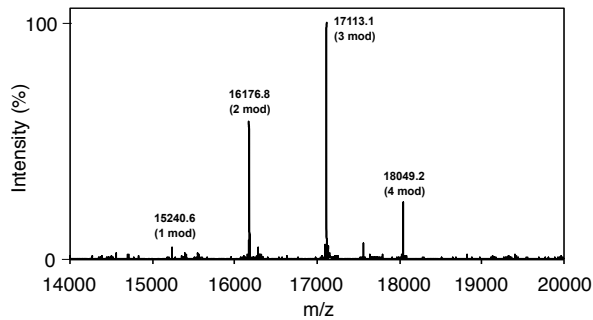

**Figure S12.** **Lys-Phos** is stable for up to 7 days. **Lys-Phos** (20  $\mu\text{M}$ ) was incubated in PBS (pH 7.4) at 37  $^\circ\text{C}$  for 1 week. The presence of **Lys-Phos** was confirmed via mass spectrometry.

## VI. Western blot analysis of protein conjugates

**Lys-CpS** (2.7  $\mu$ L of a 150  $\mu$ M solution in PBS, 20  $\mu$ M final concentration) and phosphine **9** (2  $\mu$ L of a 1 or 10 mM stock in DMSO, 250  $\mu$ M or 1 mM final concentration, respectively) were mixed with PBS (12 mM, pH 7.4) to total 20  $\mu$ L. The reactions were incubated at 37 °C for 0–60 min. For time course experiments, reactions were quenched with 2-(4-morpholino-4-oxobutyl)cycloprop-2-en-1-one<sup>3</sup> (1  $\mu$ L, 100 mM in DMSO) and stored at –20 °C until SDS-PAGE analysis. For cell lysate experiments, overnight cultures of *E. coli* XL1 cells were grown in Luria-Bertani broth containing tetracycline (10  $\mu$ g/mL). Cultures were incubated at 37 °C with shaking (225 rpm). Cells were collected by centrifugation, resuspended in PBS (pH 7.4), sonicated, and centrifuged (14,500 rpm, 30 min). Total protein concentration was determined using UV-vis spectroscopy.

To prepare samples for SDS-PAGE and Western blot, 6.7  $\mu$ L of 4X SDS-PAGE loading buffer (containing 8%  $\beta$ ME) was added to each reaction mixture. For lysate labeling experiments, 5  $\mu$ L of 8 M urea and 8.3  $\mu$ L of 4X SDS-PAGE loading buffer (containing 8%  $\beta$ ME) were added. Samples were then split evenly into 2 portions and subjected to SDS-PAGE using 4–20% polyacrylamide gels (BioRad). For each experiment, one gel was stained with Coomassie Blue, and the second was electroblotted to a nitrocellulose membrane (0.2  $\mu$ m, BioRad). Membranes were stained with Ponceau C to assess transfer efficiency, then rinsed with H<sub>2</sub>O and incubated with blocking buffer (7% BSA in PBS containing 1% Tween-20<sup>®</sup>, PBST) overnight at 4 °C. The membranes were then treated with IRDye<sup>®</sup> 800CW streptavidin (LI-COR Biosciences; 1:10,000 dilution in blocking buffer) for 2 h at room temperature. Membranes were then washed with PBST (6 x 10 min) and PBS (3 x 5 min). Blots were imaged using an Odyssey infrared imaging system (LI-COR, Odyssey<sup>®</sup> CLx).



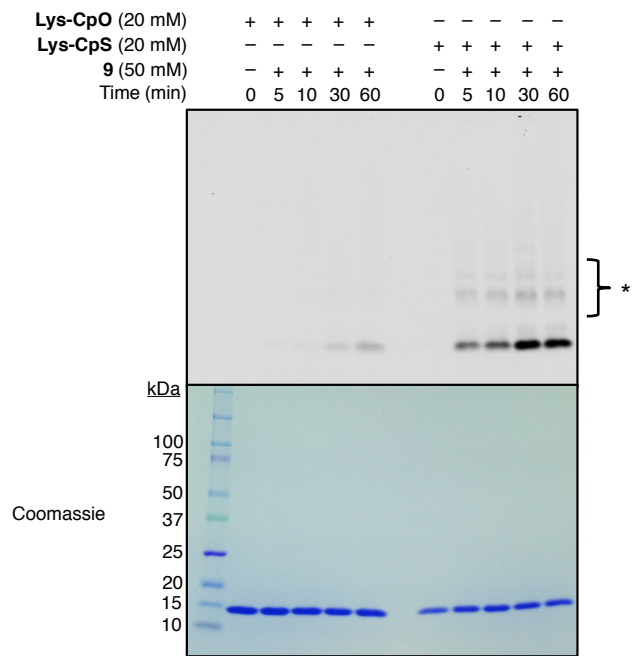

**Figure S13.** Western blot of **Lys-CpO** and **Lys-CpS** reaction time course. This image shows the full Western blot (above) and Coomassie-stained gel (below) shown in Figure 4C of the main text.  
 \*Impurities present in commercial stock.

## VII. Synthetic procedures

Compounds **S1**,<sup>4</sup> **3b–c**,<sup>5</sup> **4** and **6**,<sup>3</sup> **5**,<sup>6</sup> **7–8**,<sup>4</sup> and **9**<sup>4</sup> were prepared as previously reported.

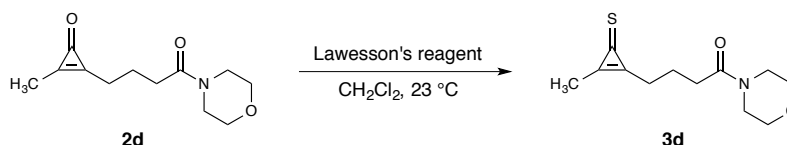

### 4-(2-Methyl-3-thioxocycloprop-1-en-1-yl)-1-morpholinobutan-1-one (**3d**)

This compound was synthesized following the general procedure of Zhao, *et al.*<sup>7</sup> To a flame-dried 25 mL round-bottom flask was added **2d** (185 mg, 0.830 mmol). Anhydrous CH<sub>2</sub>Cl<sub>2</sub> (10 mL) was added under an atmosphere of N<sub>2</sub>. Lawesson's reagent (170 mg, 0.420 mmol) was then added, and the reaction was stirred at room temperature for 2 h. Approximately half of the solvent was removed *in vacuo*, and the crude reaction mixture was purified by flash column chromatography (eluting with 0–2% MeOH/CH<sub>2</sub>Cl<sub>2</sub>) to give **3d** as a pale yellow oil (132 mg, 0.552 mmol, 66.5%). <sup>1</sup>H NMR (400 MHz, CDCl<sub>3</sub>) δ 3.72–3.76 (m, 4H), 3.63–3.61 (m, 2H), 3.60–3.57 (m, 2H), 2.95 (tq, *J* = 6.7, 0.8 Hz, 2H), 2.72 (t, *J* = 7.1 Hz, 2H), 2.49 (t, *J* = 0.8 Hz, 3H), 2.13 (quin, *J* = 6.9 Hz, 2H). <sup>13</sup>C NMR (126 MHz, CDCl<sub>3</sub>) δ 186.4, 170.5, 168.6, 164.9, 67.0, 66.8, 46.1, 42.1, 31.9, 26.0, 21.2, 11.3. HRMS (ESI+) calculated for C<sub>12</sub>H<sub>17</sub>NO<sub>2</sub>SNa [M+Na]<sup>+</sup> 262.0878 *m/z*, found 262.0868.

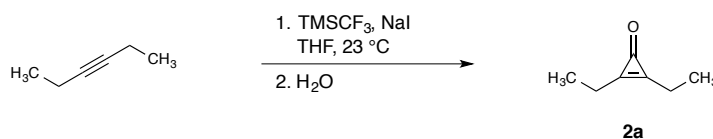

### 2,3-Diethylcycloprop-2-en-1-one (**2a**)

This compound was synthesized following the general procedure of Wang, *et al.*<sup>8</sup> with some modifications. To an oven-dried Schlenk tube containing a stir bar was added NaI (330 mg, 2.2 mmol). The NaI was gently flame-dried under vacuum. A solution of 3-hexyne (0.11 mL, 1.0 mmol) in anhydrous THF (3.0 mL) was then added against positive N<sub>2</sub> flow. Trifluoromethyltrimethylsilane (0.30 mL, 2.0 mmol) was added, and the Schlenk tube was sealed. The reaction was stirred vigorously at room temperature for ~14 h, then diluted with H<sub>2</sub>O (20 mL) and extracted with CH<sub>2</sub>Cl<sub>2</sub> (3 x 10 mL). The combined organic layers were dried over MgSO<sub>4</sub> and filtered. The filtrate was concentrated *in vacuo*, and the residue was purified by flash column chromatography (eluting with 0–10% acetone/CH<sub>2</sub>Cl<sub>2</sub>) to give **2a** as a yellow oil (65 mg, 0.59 mmol, 59%). <sup>1</sup>H NMR (400 MHz, CDCl<sub>3</sub>) δ 2.64 (qt, *J* = 7.6, 0.9 Hz, 4H), 1.31 (app t, *J* = 7.6 Hz, 6H). <sup>13</sup>C NMR (126 MHz, CDCl<sub>3</sub>) δ 161.5, 159.8, 20.0, 11.3. HRMS (ESI+) calculated for C<sub>7</sub>H<sub>10</sub>ONa [M+Na]<sup>+</sup> 133.0629 *m/z*, found 133.0629.

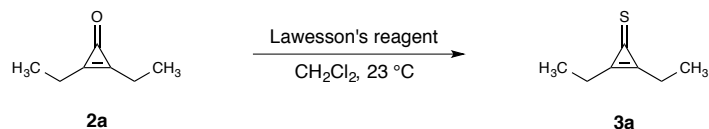

### 2,3-Diethylcycloprop-2-ene-1-thione (3a)

This compound was synthesized following the general procedure of Zhao, *et al.*<sup>7</sup> To a flame-dried 50 mL round-bottom flask was added **2a** (110 mg, 1.0 mmol). Anhydrous CH<sub>2</sub>Cl<sub>2</sub> (10 mL) was added under an atmosphere of N<sub>2</sub>. Lawesson's reagent (200 mg, 0.50 mmol) was then added, and the reaction was stirred at room temperature for 1 h. Approximately half of the solvent was removed *in vacuo*, and the crude reaction mixture was purified by flash column chromatography (eluting with 0–10% acetone/CH<sub>2</sub>Cl<sub>2</sub>) to give **3a** as a pale yellow oil (110 mg, 0.87 mmol, 87%). <sup>1</sup>H NMR (400 MHz, CDCl<sub>3</sub>) δ 2.85 (qt, *J* = 7.6, 0.9 Hz, 4H), 1.39 (app t, *J* = 7.5 Hz, 6H). <sup>13</sup>C NMR (126 MHz, CDCl<sub>3</sub>) δ 186.2, 169.1, 19.9, 10.1. HRMS (ESI+) calculated for C<sub>7</sub>H<sub>10</sub>SNa [M+Na]<sup>+</sup> 149.0401 *m/z*, found 149.0403.

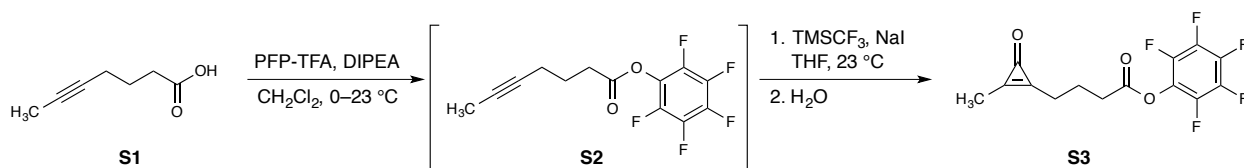

### Perfluorophenyl 4-(2-methyl-3-oxocycloprop-1-en-1-yl)butanoate (S3)

To a flame-dried 50 mL round-bottom flask was added **S1** (2.00 g, 15.9 mmol), anhydrous CH<sub>2</sub>Cl<sub>2</sub> (50 mL), and diisopropylethylamine (5.50 mL, 31.7 mmol). The solution was stirred under an atmosphere of N<sub>2</sub> and cooled in an ice bath. Pentafluorophenyl trifluoroacetate (4.10 mL, 23.8 mmol) was added dropwise over ~5 min. The reaction was warmed to room temperature and stirred for 45 min. Excess solvent was then removed *in vacuo*, and the crude reaction mixture was purified by flash column chromatography (eluting with 0–5% Et<sub>2</sub>O/hexanes) to give **S2** as a pale yellow oil. This material was used directly in the next step.

Compound **S3** was synthesized following the general procedure of Wang *et al.*<sup>8</sup> with some modifications. To an oven-dried Schlenk tube containing a stir bar was added NaI (4.15 g, 27.7 mmol). The NaI was gently flame-dried under vacuum. Compound **S2** was dissolved in anhydrous THF (38.0 mL) and added against positive N<sub>2</sub> flow. Trifluoromethyltrimethylsilane (3.70 mL, 25.1 mmol) was added, and the Schlenk tube was sealed. The reaction was stirred vigorously at room temperature for ~36 h, and then diluted with H<sub>2</sub>O (100 mL) and extracted with CH<sub>2</sub>Cl<sub>2</sub> (3 x 30 mL). The combined organic layers were dried over MgSO<sub>4</sub>, then filtered. The filtrate was concentrated *in vacuo*, and the residue was purified by flash column chromatography (eluting with 50–100% EtOAc/hexanes) to give **S3** as a dark yellow solid (2.75 g, 8.59 mmol, 54.0% over 2 steps). <sup>1</sup>H NMR (400 MHz, CDCl<sub>3</sub>) δ 2.85 (t, *J* = 7.3 Hz, 2H), 2.77 (tq, *J* = 7.4, 0.9 Hz, 2H), 2.31 (t, *J* = 0.9 Hz, 3H), 2.20 (quin, *J* = 7.3 Hz, 2H). <sup>19</sup>F NMR (376 MHz, CDCl<sub>3</sub>) δ -153.0 (d, *J* = 16.9 Hz, 2F), -157.9 (t, *J* = 21.8 Hz, 1F), -162.3 (dd, *J* = 21.7, 17.2 Hz, 2F). <sup>13</sup>C NMR (126 MHz, CDCl<sub>3</sub>) δ 168.6, 159.9, 159.2, 158.1, 141.1 (ddq, *J* = 251.4, 12.3, 4.1 Hz), 139.6 (dt<sub>app</sub>, *J* = 253.8, 13.8, 3.9 Hz), 137.9 (m), 124.9 (m), 32.4, 25.4, 21.3, 11.4. HRMS (ESI+) calculated for C<sub>14</sub>H<sub>9</sub>F<sub>5</sub>O<sub>3</sub>Na [M+Na]<sup>+</sup> 343.0370 *m/z*, found 343.0378.

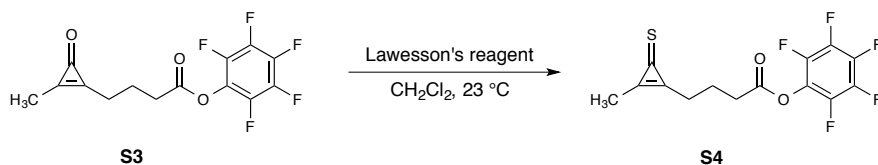

### Perfluorophenyl 4-(2-methyl-3-thioxocycloprop-1-en-1-yl)butanoate (**S4**)

This compound was synthesized following the general procedure of Zhao, *et al.*<sup>7</sup> To a flame-dried 50 mL round-bottom flask was added **S3** (143 mg, 0.450 mmol). Anhydrous  $\text{CH}_2\text{Cl}_2$  (6.0 mL) was added under an atmosphere of  $\text{N}_2$ . Lawesson's reagent (100 mg, 0.247 mmol) was then added, and the reaction was stirred at room temperature for 2 h. Approximately half of the solvent was removed *in vacuo*, and the crude reaction mixture was purified by flash column chromatography (eluting with 50–100% EtOAc/hexanes) to give **S4** as a pale yellow solid (121 mg, 0.360 mmol, 80.0%).  $^1\text{H}$  NMR (400 MHz,  $\text{CDCl}_3$ )  $\delta$  2.99 (t,  $J = 7.2$  Hz, 2H), 2.98 (tq,  $J = 7.2, 0.9$  Hz, 2H), 2.52 (t,  $J = 0.9$  Hz, 3H), 2.29 (quin,  $J = 7.2$  Hz, 2H).  $^{19}\text{F}$  NMR (376 MHz,  $\text{CDCl}_3$ )  $\delta$  -153.0 (d,  $J = 17.1$  Hz, 2F), -157.8 (t,  $J = 21.7$  Hz, 1F), -162.3 (dd,  $J = 21.8, 17.2$  Hz, 2F).  $^{13}\text{C}$  NMR (126 MHz,  $\text{CDCl}_3$ )  $\delta$  186.1, 168.6, 167.2, 165.3, 141.1 (ddq,  $J = 251.2, 12.5, 4.0$  Hz), 139.6 (dt<sub>app</sub>,  $J = 253.8, 13.9, 4.5$  Hz), 137.9 (dt<sub>app</sub>,  $J = 252.5, 14.0, 4.3$  Hz), 124.8 (m), 32.4, 25.3, 20.8, 11.3. HRMS (ESI+) calculated for  $\text{C}_{14}\text{H}_9\text{F}_5\text{O}_2\text{SNa}$   $[\text{M}+\text{Na}]^+$  359.0141  $m/z$ , found 359.0145.

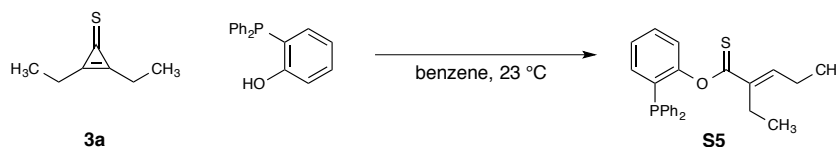

### O-(2-(Diphenylphosphanyl)phenyl) (*E*)-2-ethylpent-2-enethioate (**S5**)

To a glass vial was added **3a** (6.3 mg, 0.050 mmol) and benzene (0.65 mL). Phosphine **4** (14 mg, 0.050 mmol) was added, and the reaction was stirred at room temperature for 10 min. The crude material was then passed through a small plug of neutral alumina, eluting with hexanes. The yellow fractions were collected, and the solvent was removed *in vacuo* to give **S5** (18 mg, 0.045 mmol, 90%) as a yellow solid.  $^1\text{H}$  NMR (400 MHz,  $\text{C}_6\text{D}_6$ )  $\delta$  7.40–7.33 (m, 4H), 7.04–7.02 (m, 9H), 6.88 (t,  $J = 7.6$  Hz, 1H), 6.85–6.82 (m, 1H), 2.64 (q,  $J = 7.5$  Hz, 2H), 1.83 (quin,  $J = 7.5$  Hz, 2H), 1.11 (t,  $J = 7.5$  Hz, 3H), 0.75 (t,  $J = 7.5$  Hz, 3H).  $^{31}\text{P}$  NMR (162 MHz,  $\text{C}_6\text{D}_6$ )  $\delta$  -15.31.  $^{13}\text{C}$  NMR (126 MHz,  $\text{C}_6\text{D}_6$ )  $\delta$  211.0, 157.8 (d,  $J = 18.6$  Hz), 141.98, 141.96, 136.8 (d,  $J = 12.1$  Hz), 134.5, 134.4 (d,  $J = 20.5$  Hz), 131.7 (d,  $J = 16.1$  Hz), 130.1, 129.0, 128.8 (d,  $J = 7.0$  Hz), 126.5, 123.9 (d,  $J = 2.2$  Hz), 22.9, 22.7, 14.3, 13.2. HRMS (ESI+) calculated for  $\text{C}_{25}\text{H}_{25}\text{OPSH}$   $[\text{M}+\text{H}]^+$  405.1442  $m/z$ , found 405.1451.

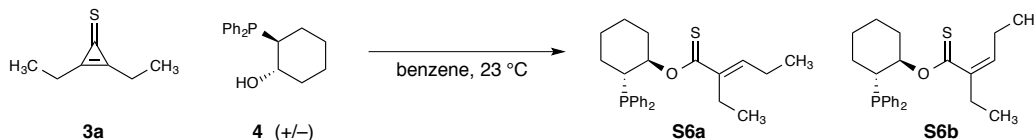

**O-((1*R*,2*R*)-2-(Diphenylphosphanyl)cyclohexyl) (*E*)-2-ethylpent-2-enethioate (**S6a**) and **O-((1*R*,2*R*)-2-(diphenylphosphanyl)cyclohexyl) (*Z*)-2-ethylpent-2-enethioate (**S6b**).****

To a glass vial was added **3a** (6.3 mg, 0.050 mmol) and benzene (1.3 mL). Phosphine **8** (16 mg, 0.050 mmol) was added, and the reaction was stirred at room temperature for 2 h. The crude material was then passed through a small plug of neutral alumina, eluting with hexanes. The yellow fractions were collected, and the solvent was removed *in vacuo* to give **S6a** and **S6b** in a 2.1:1.0 ratio (12 mg, 0.029 mmol, 58%) as a yellow oil. <sup>1</sup>H NMR (400 MHz, C<sub>6</sub>D<sub>6</sub>) δ 7.59–7.51 (m, 4H), 7.12–7.01 (m, 6H), 6.85 (t, *J* = 7.5, 1.0 Hz, 1H), 5.93–5.88 (m, 1H), 5.87–5.83 (m, 1H), 2.87 (td, *J* = 8.4, 3.7 Hz, 1H), 2.80 (td, *J* = 8.7, 3.9 Hz, 1H), 2.62–2.54 (m, 2H), 2.48–2.26 (m, 2H), 1.92–1.78 (m, 2H), 1.78–1.72 (m, 2H), 1.62–1.40 (m, 3H), 1.24–1.11 (m, 2H), 1.09 (td, *J* = 7.5, 1.0 Hz, 3H), 1.04 (td, *J* = 7.5, 1.0 Hz, 3H), 0.96 (td, *J* = 7.5, 0.8 Hz, 3H), 0.81 (t, *J* = 7.6 Hz, 3H). <sup>31</sup>P NMR (162 MHz, C<sub>6</sub>D<sub>6</sub>) δ –7.75, –8.30. <sup>13</sup>C NMR (126 MHz, C<sub>6</sub>D<sub>6</sub>) δ 216.1, 212.3, 144.1, 143.0, 141.1, 137.4 (d, *J* = 14.4 Hz), 136.77 (d, *J* = 17.3 Hz), 136.71 (d, *J* = 17.3 Hz), 135.1, 135.0, 134.9, 133.6 (d, *J* = 19.3 Hz), 133.4 (d, *J* = 18.7), 132.4, 129.3, 129.2, 128.7, 128.63, 128.58, 128.5, 128.4, 81.0 (d, *J* = 17.4 Hz), 80.9 (d, *J* = 16.7 Hz), 39.6 (d, *J* = 16.7 Hz), 39.3 (d, *J* = 17.3 Hz), 30.56, 30.51, 30.4, 30.3, 30.2, 27.0, 26.91, 26.87, 24.8 (d, *J* = 5.3 Hz), 23.7, 23.6, 23.3, 22.5 (d, *J* = 7.0 Hz), 14.4, 14.3, 13.4, 13.4. HRMS calculated for C<sub>25</sub>H<sub>31</sub>OPS [M+H]<sup>+</sup> 411.1912 *m/z*, found 411.1916.

## References

- (1) Hermanson, G. T. *Bioconjugate Techniques*; Academic Press: San Diego, 1996.
- (2) Davies, R. C.; Neuberger, A.; Wilson, B. M. *Biochim. Biophys. Acta.* **1969**, *178*, 294.
- (3) Shih, H.-W.; Prescher, J. A. *J. Am. Chem. Soc.* **2015**, *137*, 10036.
- (4) Row, R. D.; Shih, H.-W.; Alexander, A. T.; Mehl, R. A.; Prescher, J. A. *J. Am. Chem. Soc.* **2017**, *139*, 7370.
- (5) Zhao, W.-T.; Shi, M. *Tetrahedron Lett.* **2015**, *56*, 5086.
- (6) Figuly, G. D.; Loop, C. K.; Martin, J. C. *J. Am. Chem. Soc.* **1989**, *111*, 654.
- (7) Okuda, T.; Shimma, N.; Furumai, T. *J. Antibiot.* **1984**, *37*, 723.
- (8) Wang, F.; Luo, T.; Hu, J.; Wang, Y.; Krishnan, H. S.; Jog, P. V.; Ganesh, S. K.; Prakash, G. K. S.; Olah, G. A. *Angew. Chem. Int. Ed.* **2011**, *50*, 7153.

## VIII. NMR Spectra

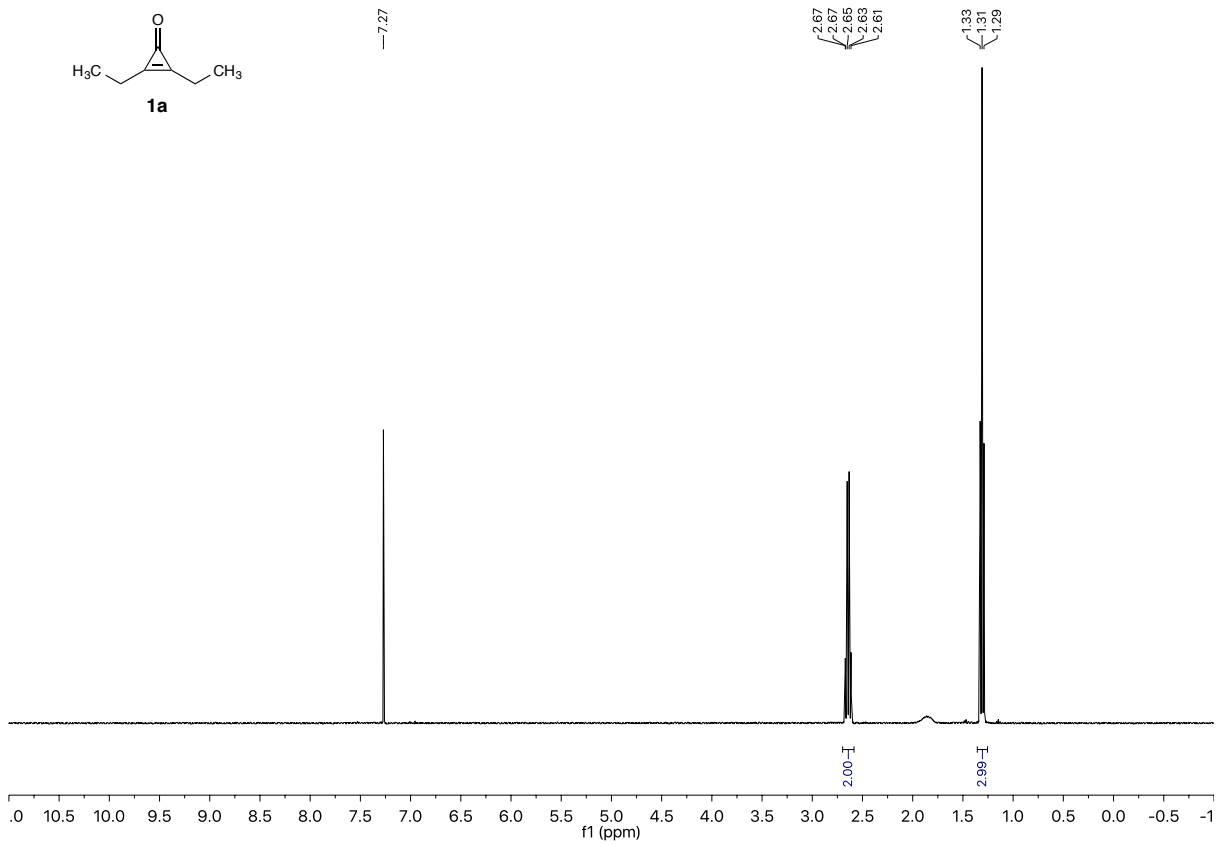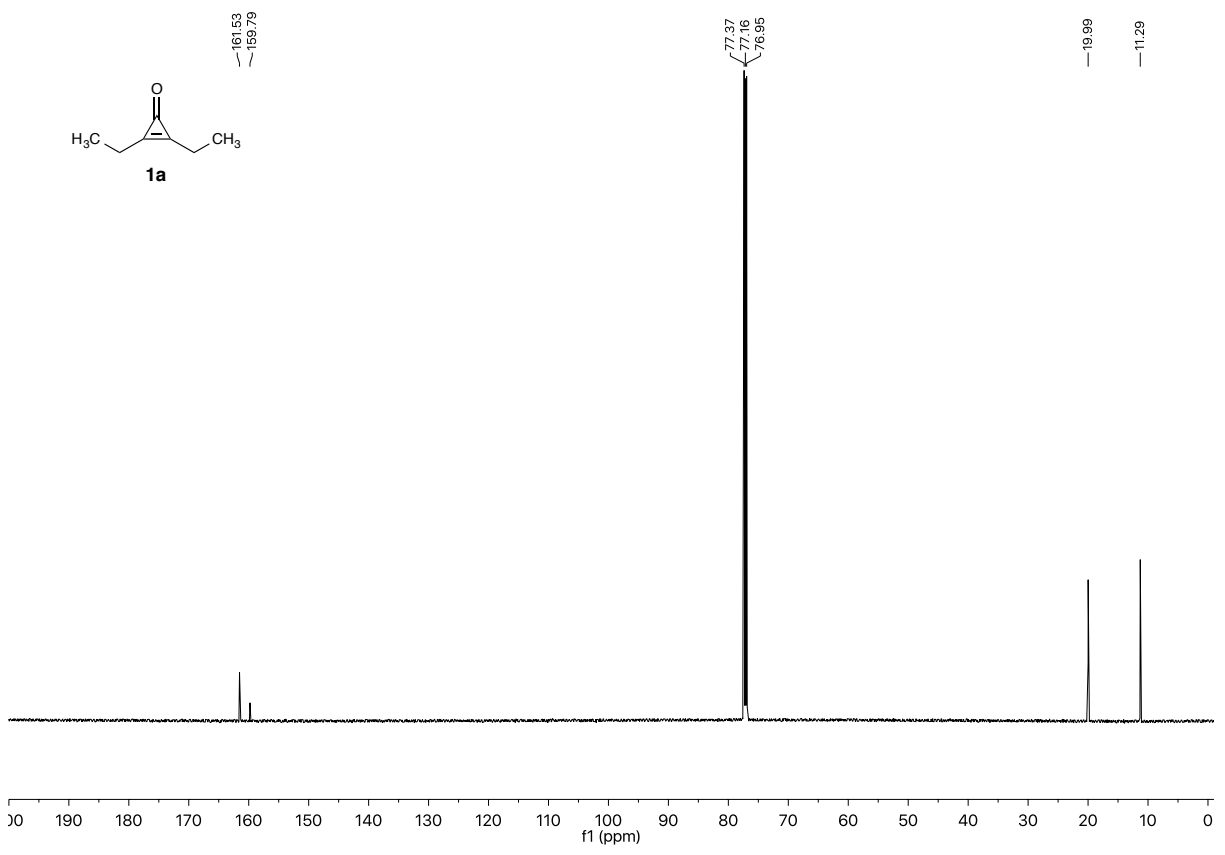

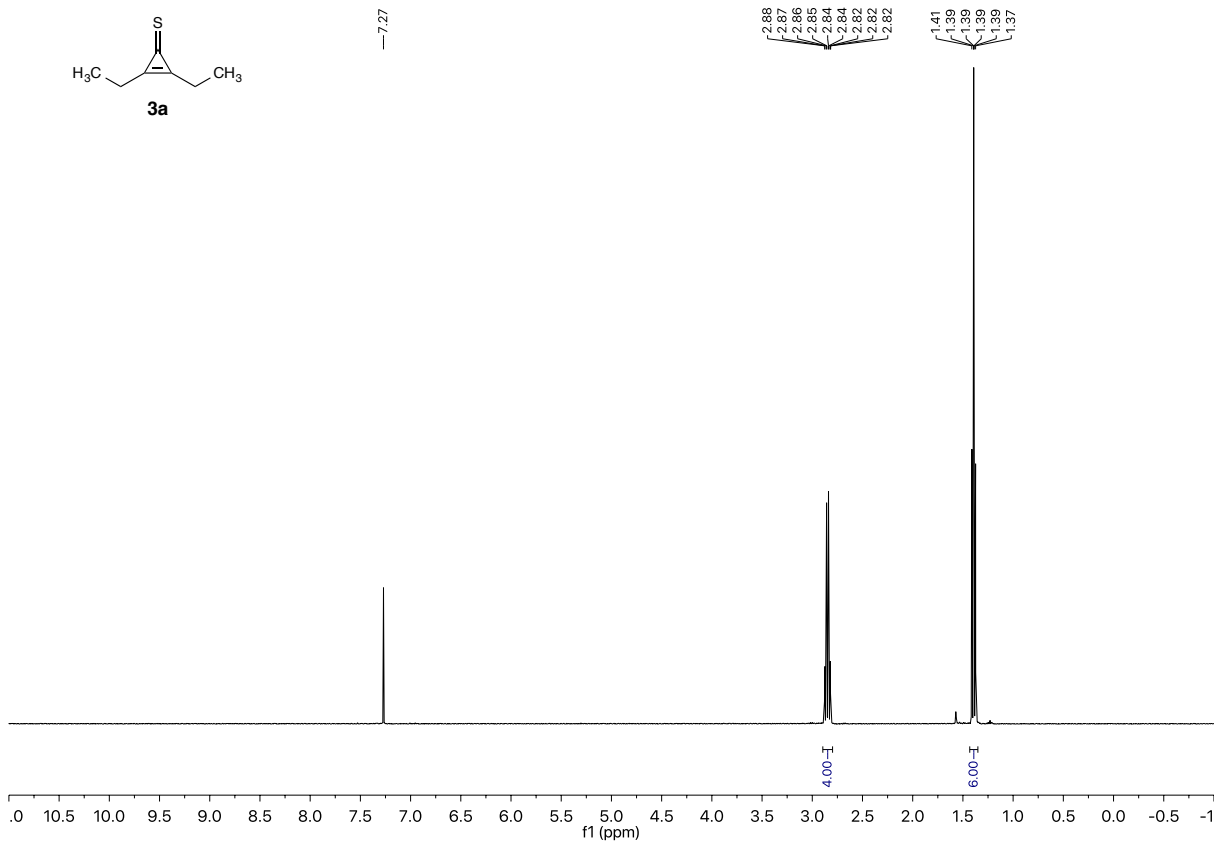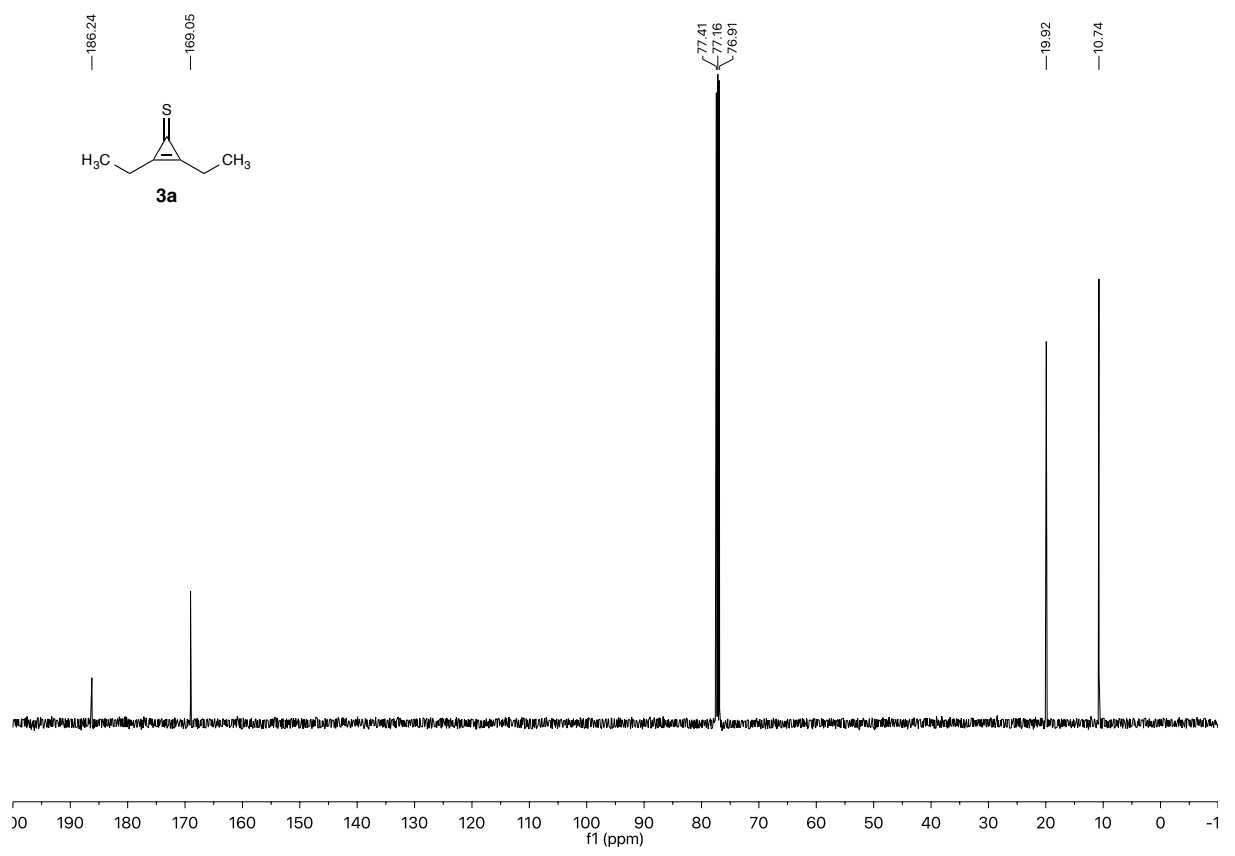

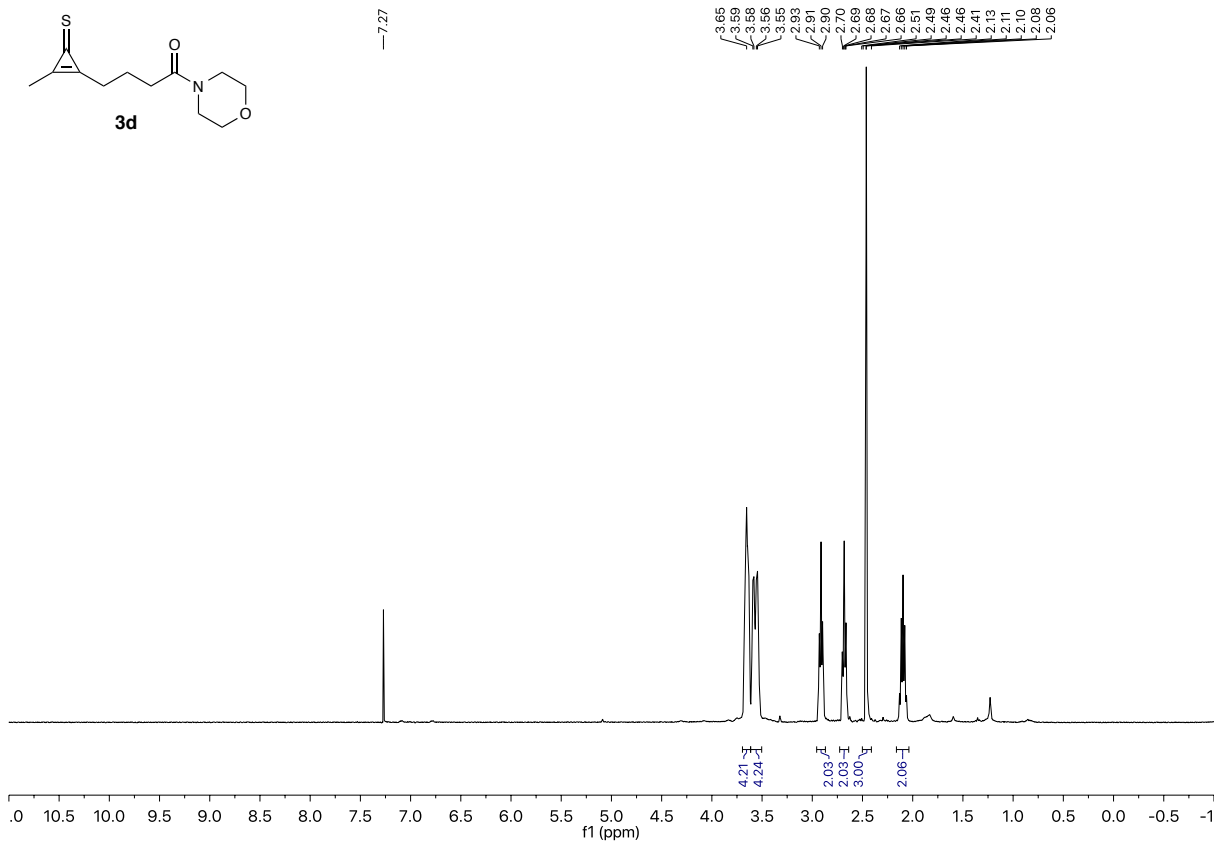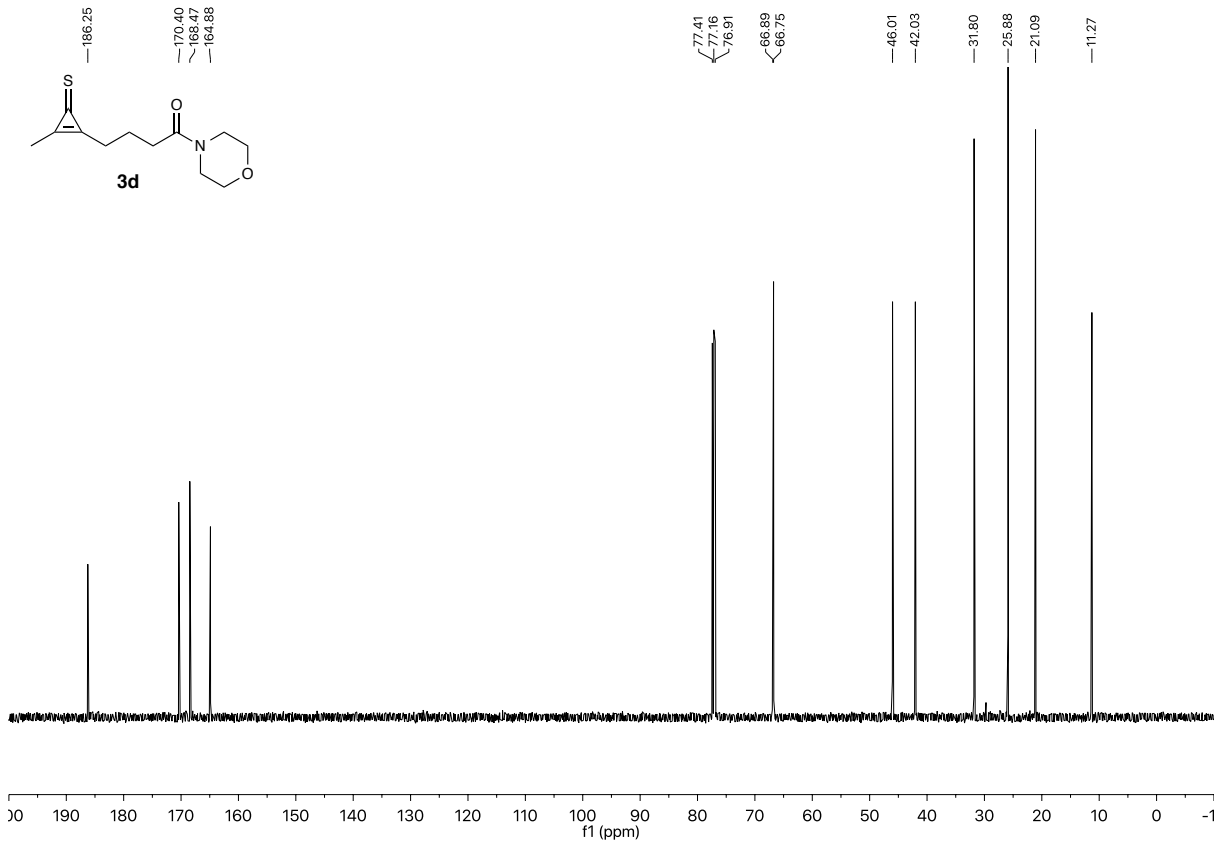



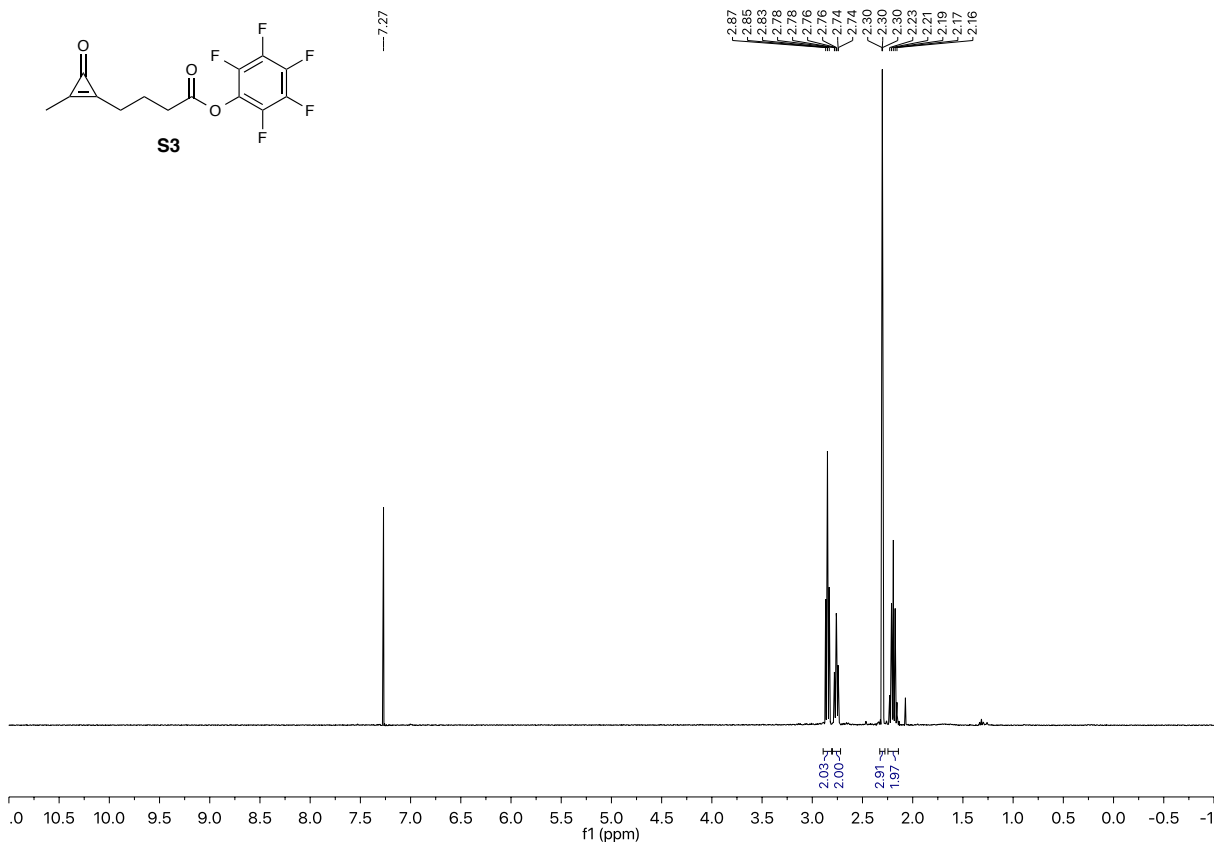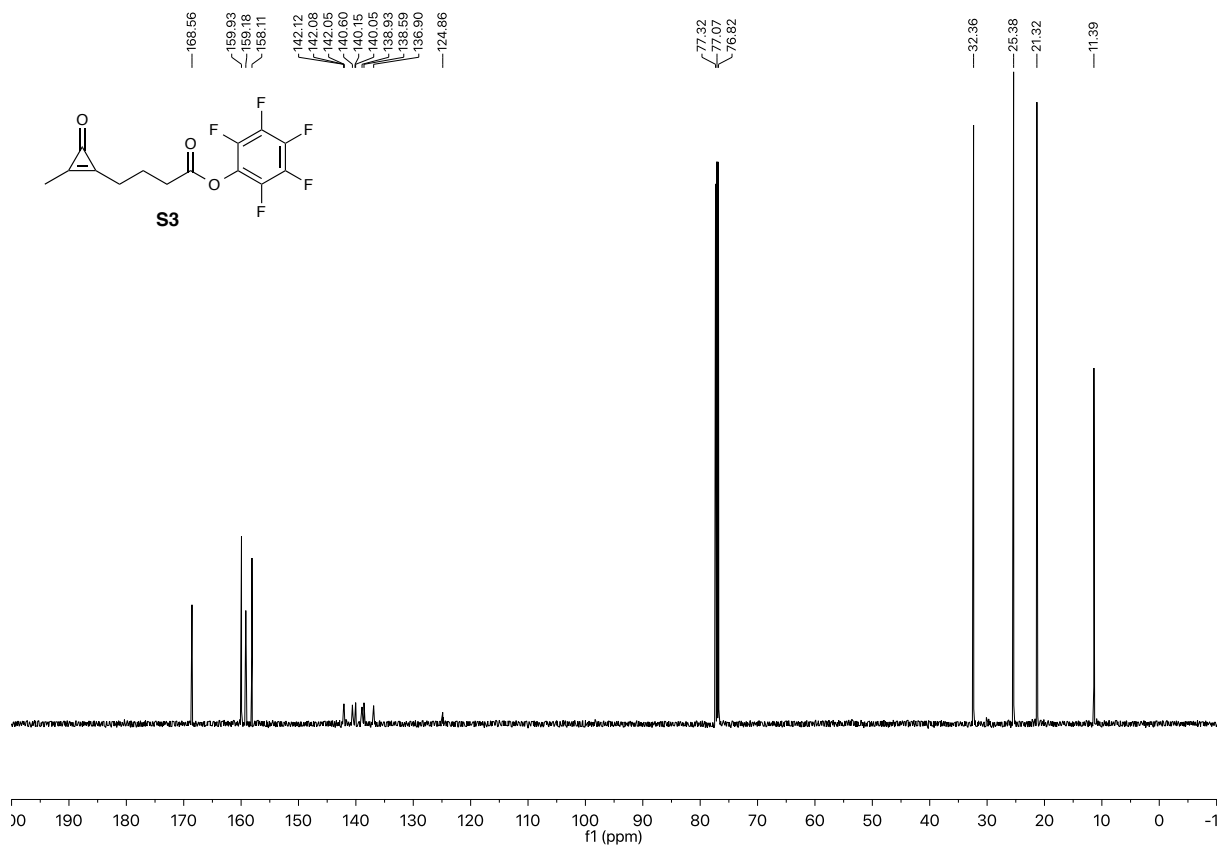

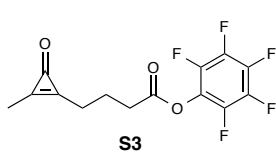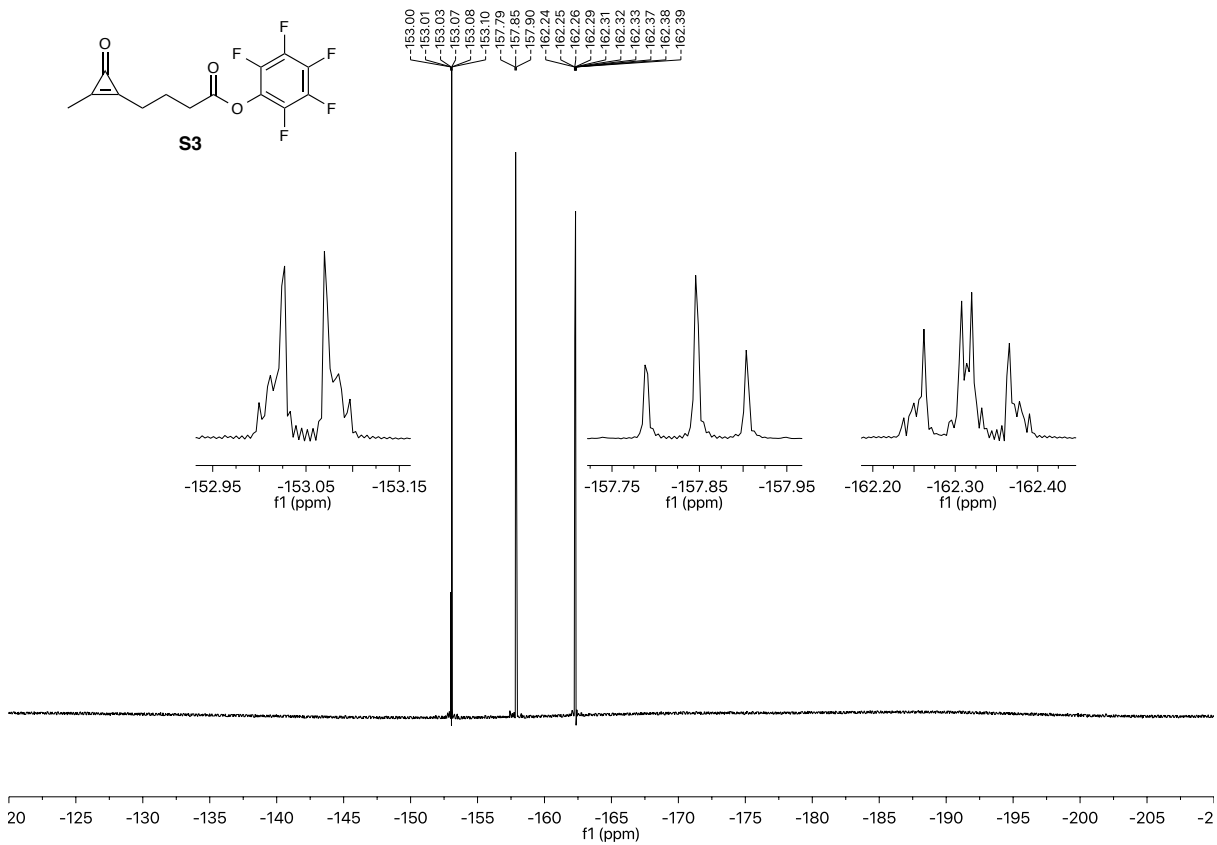

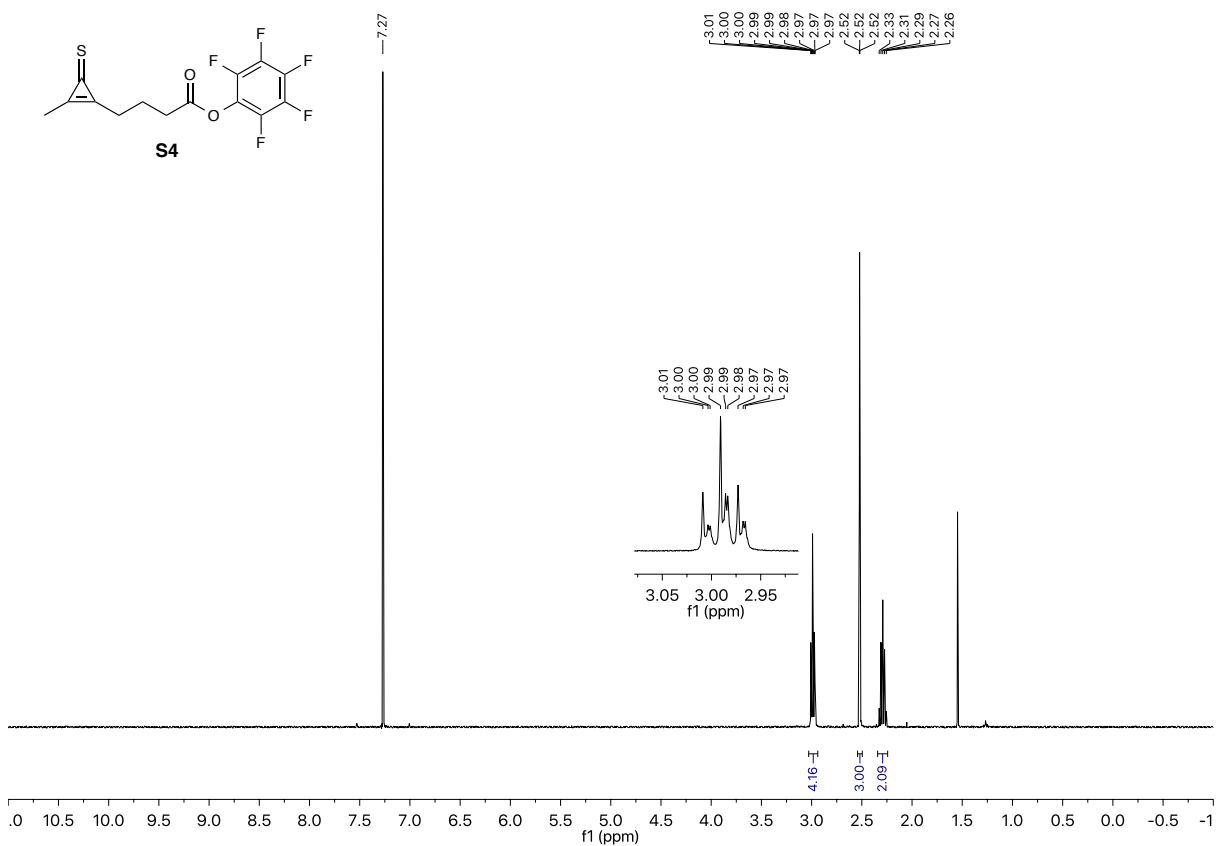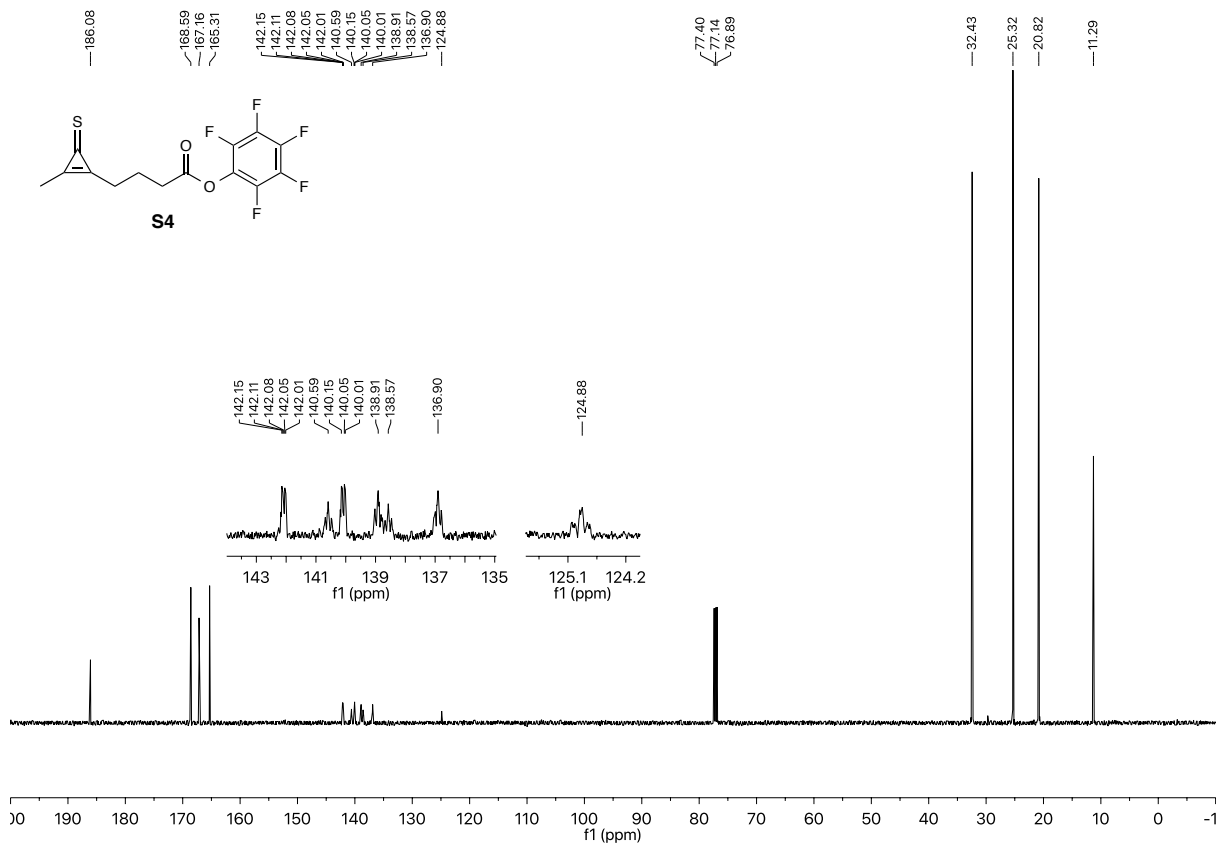

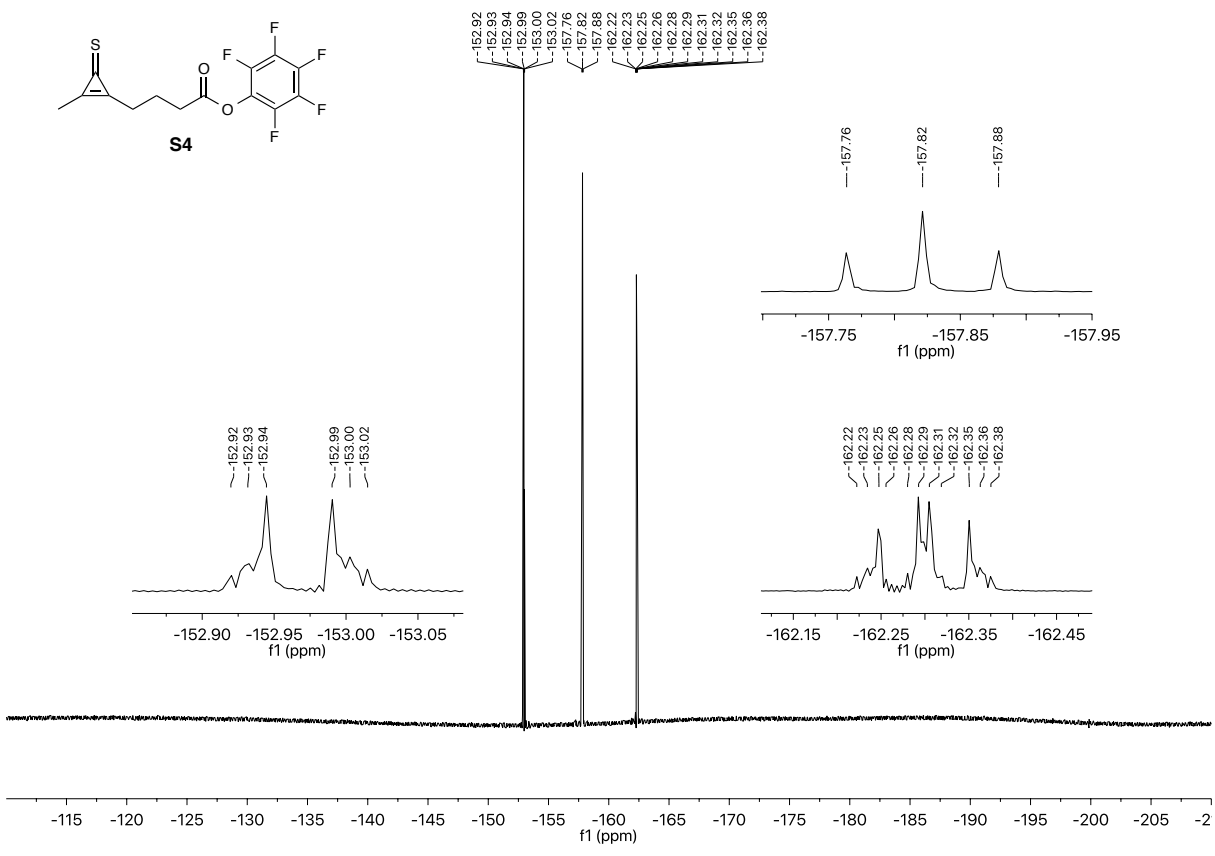

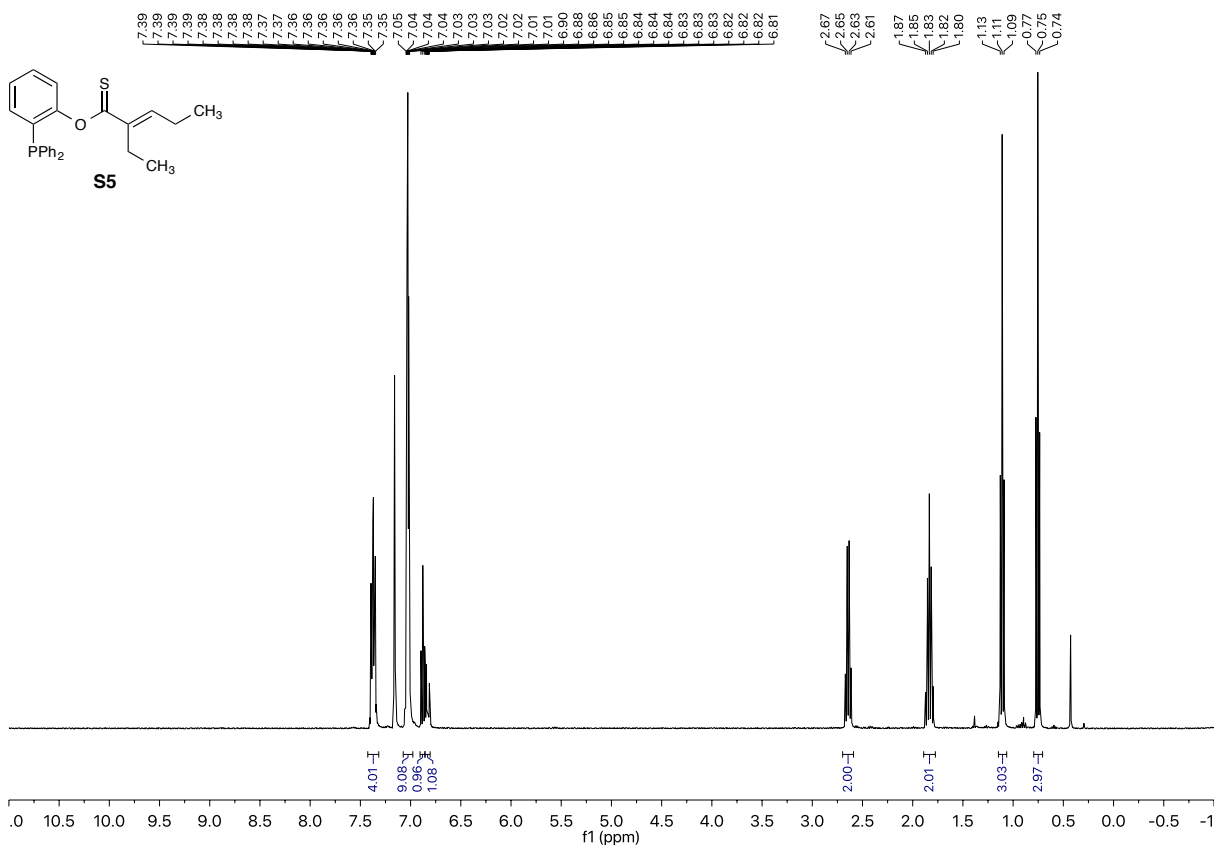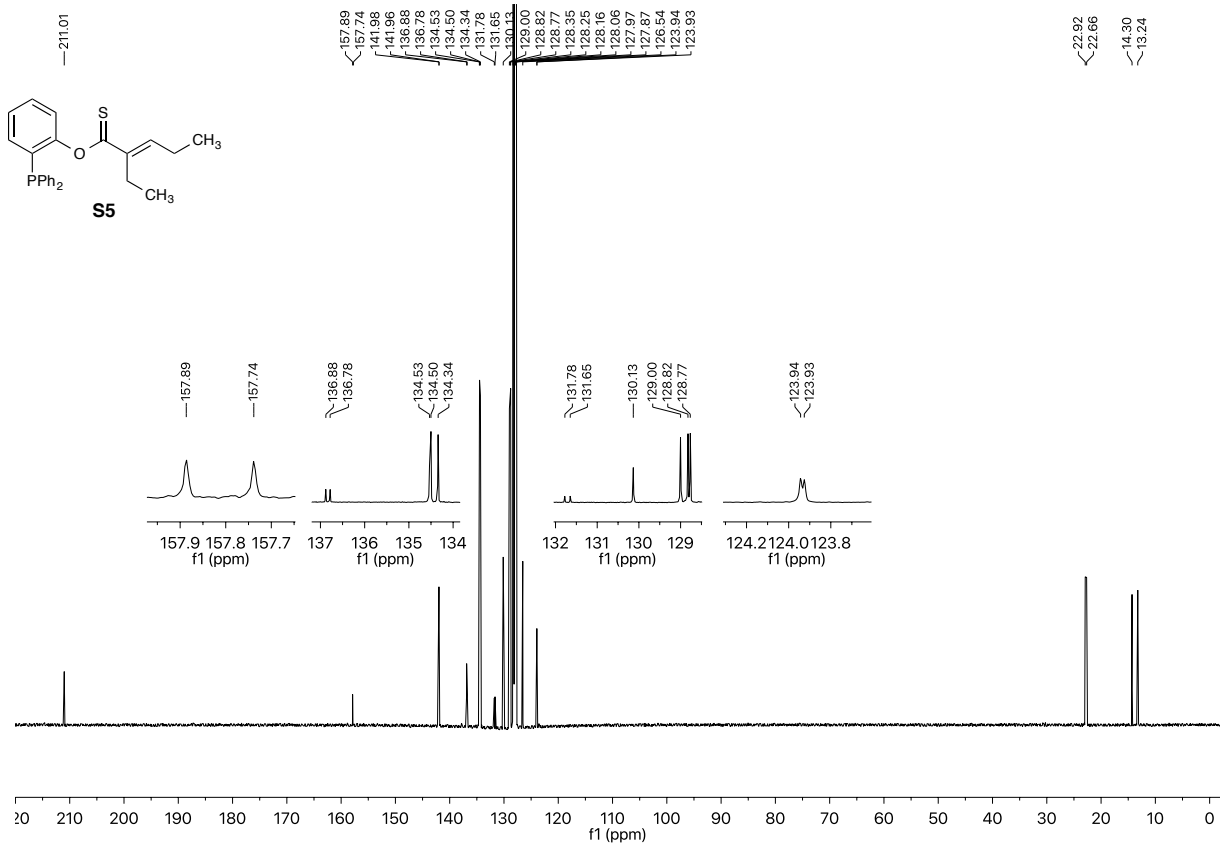

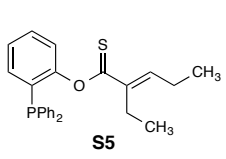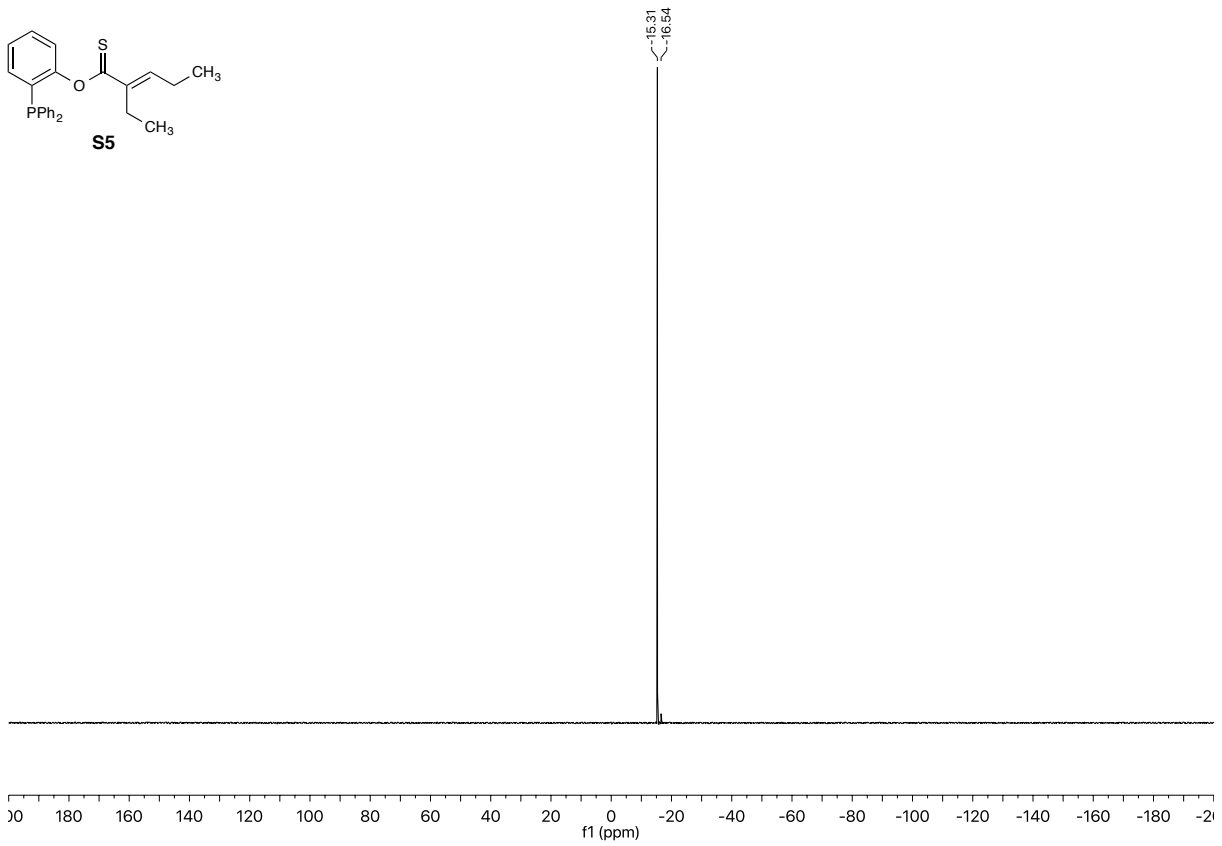

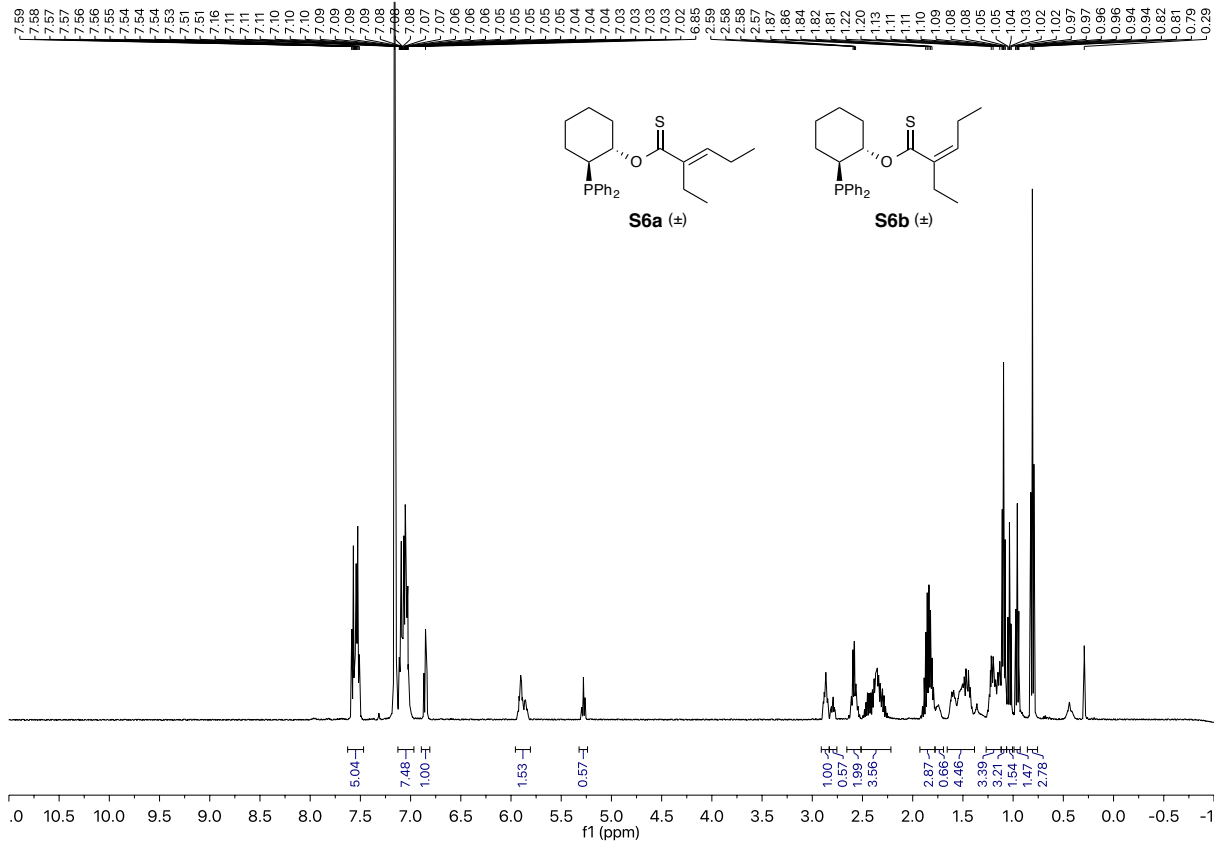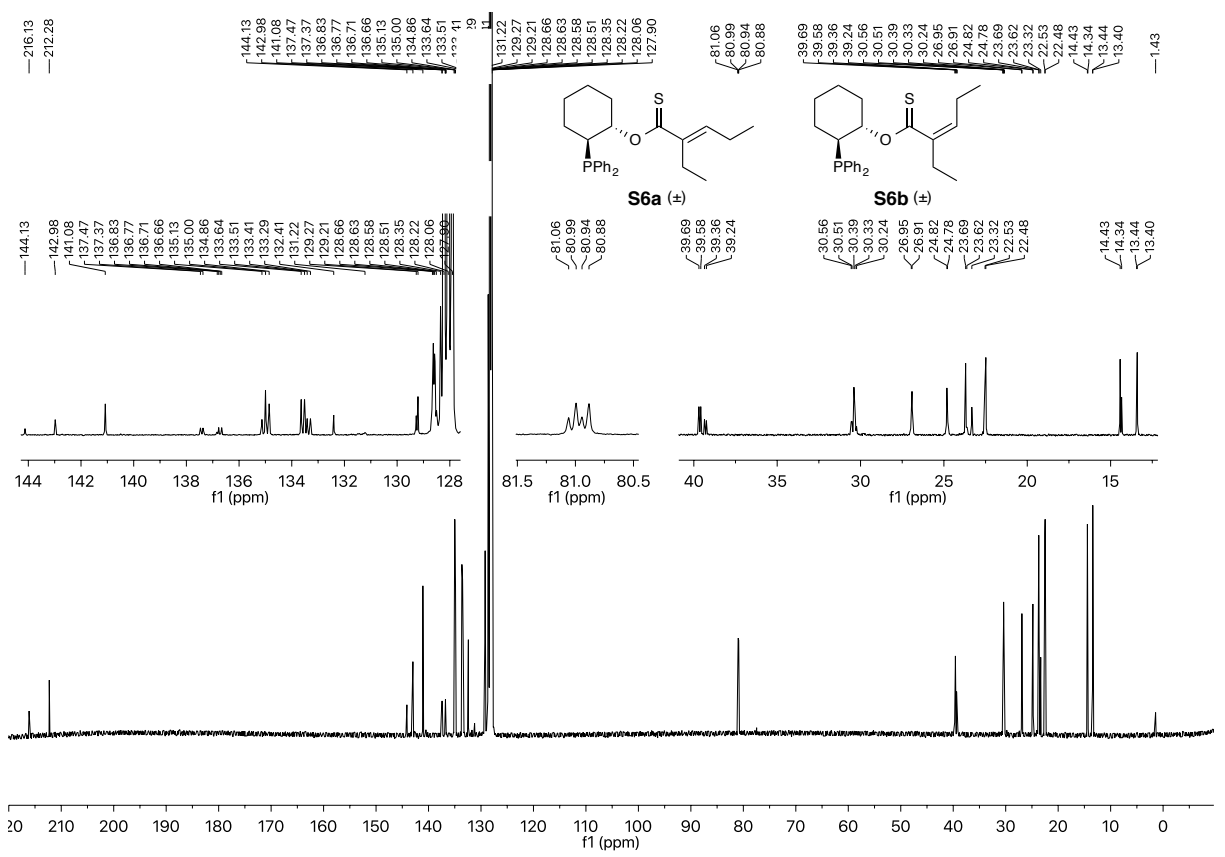

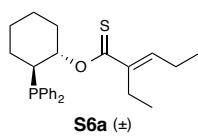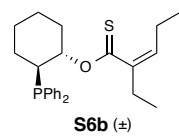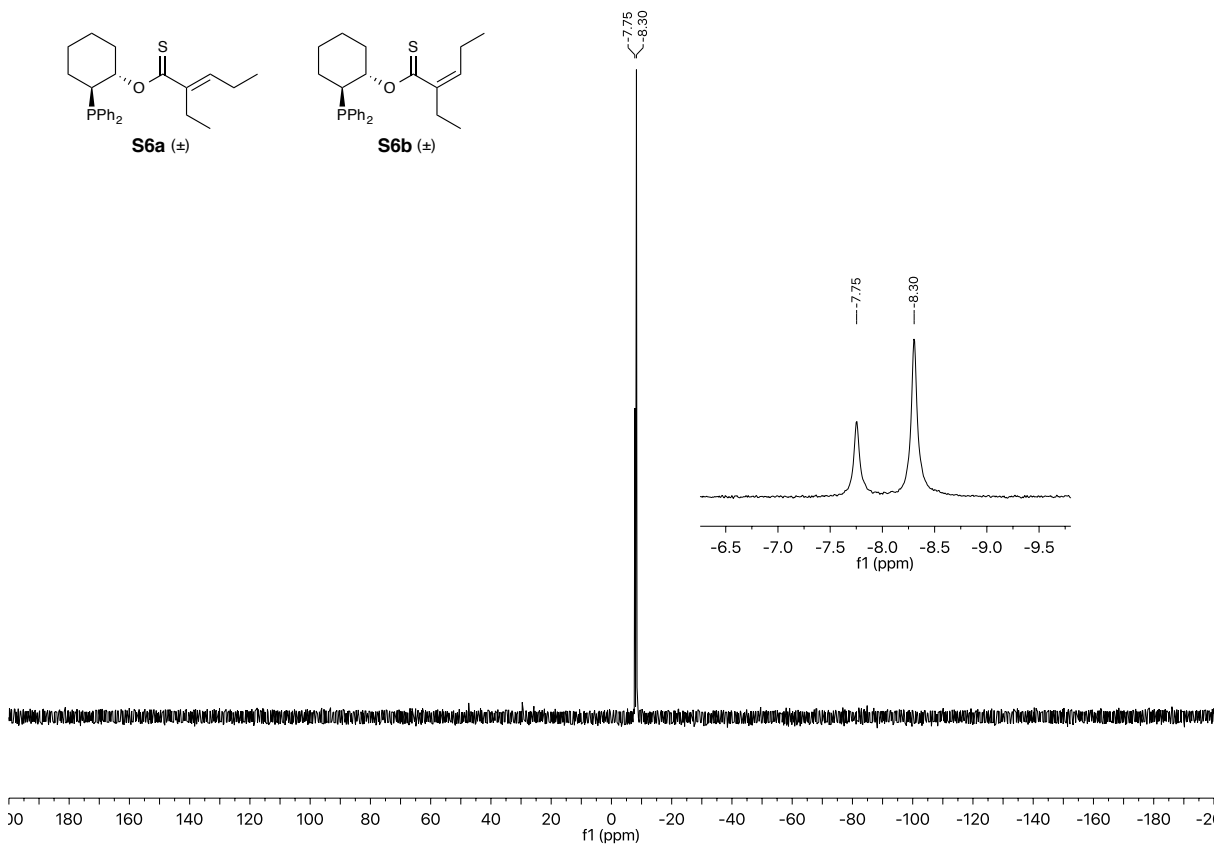

Supplement: NIHMS991052-supplement-SI.pdf [file NIHMS991052-supplement-SI.pdf]
